# Supplementary material for: Six-coordinate [CoIII(L)2]z(z= 1−, 0, 1+) complexes of an azo-appendedo-aminophenolate in amidate(2−) and iminosemiquinonate π-radical (1−) redox-levels: the existence of valence-tautomerism
Source: Royal Society of Chemistry journal article supplement (doi:10.1039/c8dt03257b), 2018-01-01
Supplement: c8dt03257b1.pdf [file c8dt03257b1.pdf]

## Supporting Information (Pages: S1-S49)

### **Six-coordinate $[\text{Co}^{\text{III}}(\text{L})_2]^z$ ( $z = 1-, 0, 1+$ ) complexes of an azo-appended *o*-aminophenolate in amidate(2-) and iminosemiquinonate $\pi$ -radical (1-) redox-levels: existence of valence-tautomerism**

**Amit Rajput, Anuj Kumar Sharma, Suman K. Barman, Francesc Lloret and Rabindranath Mukherjee\***

### Figures

**Fig. S1** ESI-MS spectrum of  $[\text{Co}(\text{L}^1)_2]$  **1**.

**Fig. S2** IR spectrum of  $[\text{Co}(\text{L}^1)_2]$  **1**.

**Fig. S3** CVgram (100 mV/s) of one-electron oxidized 1.0 mM solution of  $[\text{Co}(\text{L}^1)_2]$  **1**.

**Fig. S4** CVgram (100 mV/s) of one-electron reduced 1.0 mM solution of  $[\text{Co}(\text{L}^1)_2]$  **1**,  $[\mathbf{1}]^{1-}$  species.

**Fig. S5** ESI-MS of **2**.

**Fig. S6** ESI-MS of **3**.

**Fig. S7** CVgram (100 mV/s) of 1.0 mM solution of **2**.

**Fig. S8** CVgram (100 mV/s) of 1.0 mM solution of **3**.

**Fig. S9** IR spectrum of  $[\text{Co}(\text{L}^1)_2][\text{PF}_6] \cdot 2\text{CH}_2\text{Cl}_2$  **2**.

**Fig. S10** IR spectrum of  $[\text{Co}^{\text{III}}(\eta^5\text{-C}_5\text{H}_5)_2][\text{Co}(\text{L}^1)_2]\text{MeCN}$  **3**.

**Fig. S11**  $^1\text{H}$  NMR spectrum (400 MHz,  $\text{CDCl}_3$ ) of  $[\text{Co}(\text{L}^1)_2]$  **1** at 298 K.

**Fig. S12** Variable Temperature (VT)  $^1\text{H}$  NMR spectrum (400 MHz,  $\text{CDCl}_3$ ) of  $[\text{Co}(\text{L}^1)_2]$  **1**.

**Fig. S13**  $^1\text{H}$  NMR spectrum (400 MHz,  $\text{CDCl}_3$ ) of  $[\text{Co}(\text{L}^1)_2][\text{PF}_6] \cdot 2\text{CH}_2\text{Cl}_2$  **2** at 298 K.

**Fig. S14** Variable Temperature (VT)  $^1\text{H}$  NMR spectrum (400 MHz,  $\text{CDCl}_3$ ) of  $[\text{Co}(\text{L}^1)_2][\text{PF}_6] \cdot 2\text{CH}_2\text{Cl}_2$  **2**.

**Fig. S15**  $^{13}\text{C}$  NMR spectrum (400 MHz,  $\text{CDCl}_3$ ) of  $[\text{Co}(\text{L}^1)_2][\text{PF}_6] \cdot 2\text{CH}_2\text{Cl}_2$  **2** at 298 K.

**Fig. S16** 2D HMQC (Heteronuclear Multiple Quantum Coherence) of (400 MHz,  $\text{CDCl}_3$ )  $[\text{Co}(\text{L}^1)_2][\text{PF}_6] \cdot 2\text{CH}_2\text{Cl}_2$  **2**.

**Fig. S17**  $^1\text{H}$  NMR spectrum (400 MHz,  $\text{CDCl}_3$ ) of  $[\text{Co}^{\text{III}}(\eta^5\text{-C}_5\text{H}_5)_2][\text{Co}(\text{L}^1)_2]$  **3** 298 K.

**Fig. S18** Variable Temperature (VT)  $^1\text{H}$  NMR spectrum (400 MHz,  $\text{CDCl}_3$ ) of  $[\text{Co}^{\text{III}}(\eta^5\text{-C}_5\text{H}_5)_2][\text{Co}(\text{L}^1)_2]$  **3**.

**Fig. S19**  $^{13}\text{C}$  NMR spectrum (400 MHz,  $\text{CDCl}_3$ ) of  $[\text{Co}^{\text{III}}(\eta^5\text{-C}_5\text{H}_5)_2][\text{Co}(\text{L}^1)_2]$  **3** 298 K.

**Fig. S20.** Optimized-structure for  $[\mathbf{1}]^{1-}$ , where no spin-population is found.

**Fig. S21** X-band EPR spectra recorded for  $[\text{Co}^{\text{III}}(\eta^5\text{-C}_5\text{H}_5)_2][\text{Co}(\text{L}^1)_2]\text{MeCN}$  **3** as solid (298 K).

**Fig. S22** UV-Vis-NIR spectra of **1-3** in  $\text{CH}_2\text{Cl}_2$ .

**Fig. S23** Absorption spectral measurements on ligand in neutral, dianionic and radical-anion forms recorded in  $\text{CH}_2\text{Cl}_2$

**Fig. S24** TD-DFT-calculated electronic spectra of **1**,  $[\mathbf{1}]^{1+}$  and  $[\mathbf{1}]^{1-}$ .

**Fig. S25.** Representative molecular-orbitals involved in TD-DFT of **1**.

**Fig. S26** Representative molecular orbitals involved in TD-DFT of  $[\mathbf{1}]^{1+}$ .

**Fig. S27** Representative molecular orbitals involved in TD-DFT of  $[\mathbf{1}]^{1-}$ .

## Tables

**Table S1.** Data collection and structure refinement parameters for  $[\text{Co}(\text{L}^1)_2]$  **1**,  $[\text{Co}^{\text{III}}(\text{L}^1)_2][\text{PF}_6] \cdot 2\text{CH}_2\text{Cl}_2$  **2**, and  $[\text{Co}^{\text{III}}(\eta^5\text{-C}_5\text{H}_5)_2][\text{Co}(\text{L}^1)_2] \cdot \text{MeCN}$  **3**.

**Table S2.** Comparison of X-ray determined experimental bond lengths with the calculated bond lengths from metrical oxidation state MOS (in parentheses) of  $[\text{Fe}(\text{L}^1)_2]$  and  $[\text{Fe}(\text{L}^1)_2]^+$ .

**Table S3.** DFT-optimized cartesian coordinates of **1**.

**Table S4.** DFT-optimized coordinates of  $[\mathbf{1}]^{1+}$ .

**Table S5.** DFT-optimized coordinates of  $[\mathbf{1}]^{1-}$ .

**Table S6.** X-ray structural and DFT-optimized (in parentheses) bond lengths of **1**,  $[\mathbf{1}]^{1+}$  and  $[\mathbf{1}]^{1-}$ .

**Table S7.** TD-DFT-calculated electronic transitions of **1**.

**Table S8.** TD-DFT-calculated electronic transitions of  $[\mathbf{1}]^{1+}$ .

**Table S9.** TD-DFT-calculated electronic transitions of  $[\mathbf{1}]^{1-}$ .

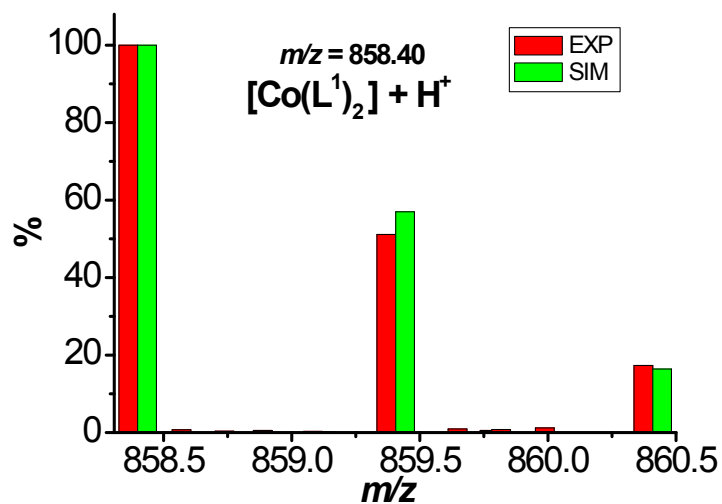

Fig. S1. Positive-ion ESI-MS spectrum of **1**  $\{[\text{Co}(\text{L}^1)_2] + \text{H}^+\}$ .

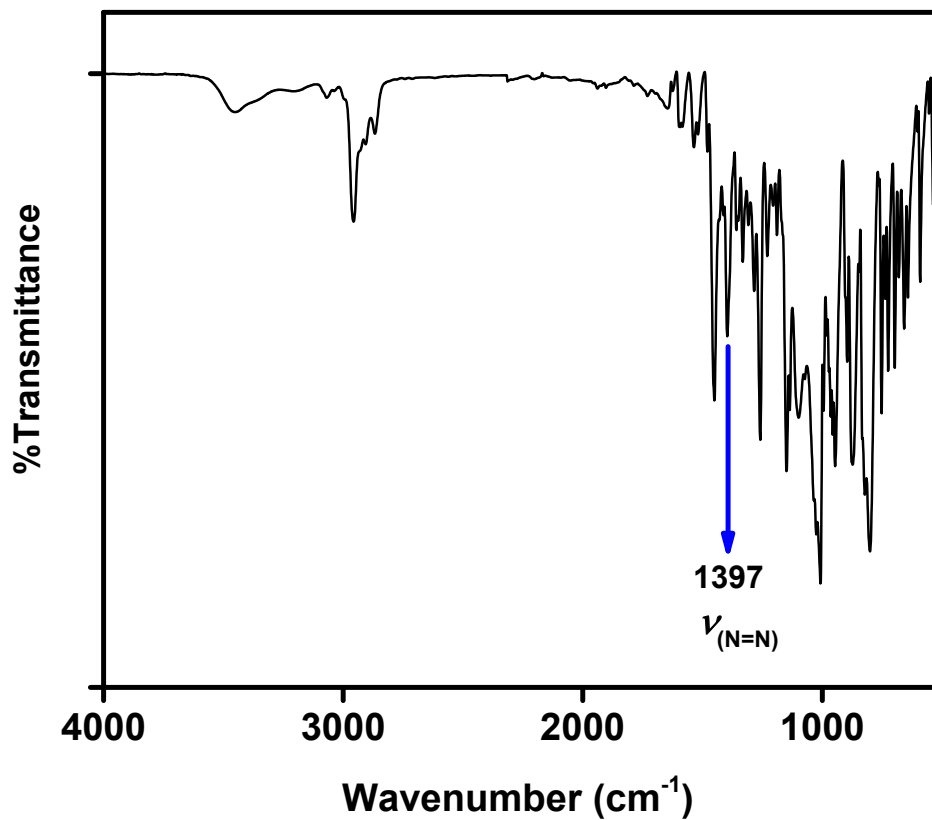

Fig. S2 IR spectrum of  $[\text{Co}(\text{L}^1)_2]$  **1**.

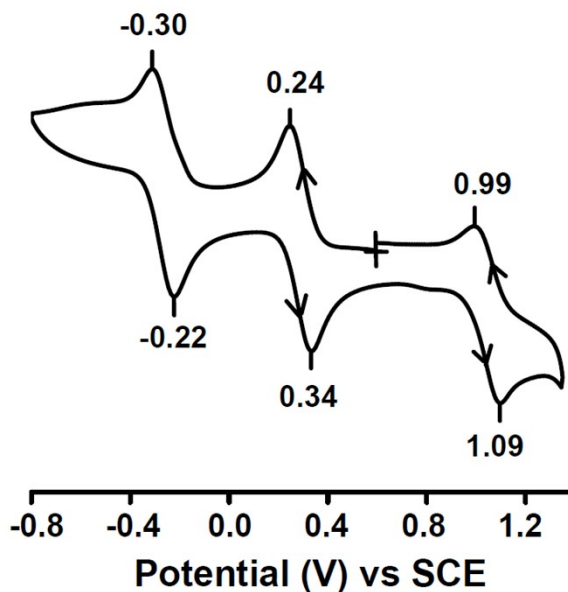

**Fig. S3** CVgram (100 mV/s) of coulometrically-generated  $1e^-$  oxidized 1.0 mM solution of  $[\text{Co}(\text{L}^1)_2]$  **1** in  $\text{CH}_2\text{Cl}_2$  (0.1 M in TBAP) at a platinum working electrode.

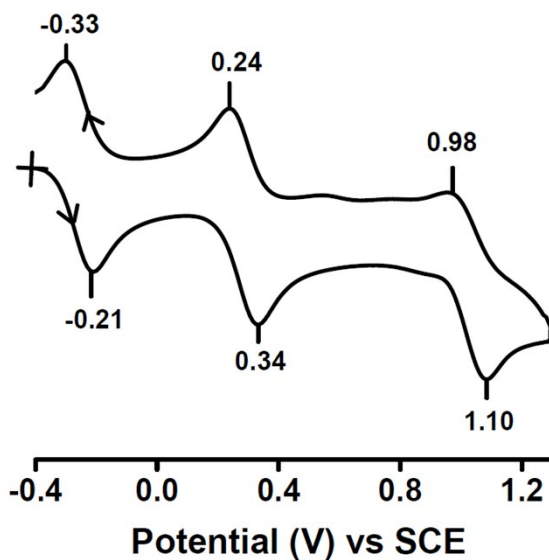

**Fig. S4** CVgram (100 mV/s) of coulometrically-generated  $1e^-$  reduced 1.0 mM solution of  $[\text{Co}(\text{L}^1)_2]$  **1** in  $\text{CH}_2\text{Cl}_2$  (0.1 M in TBAP) at a platinum working electrode.

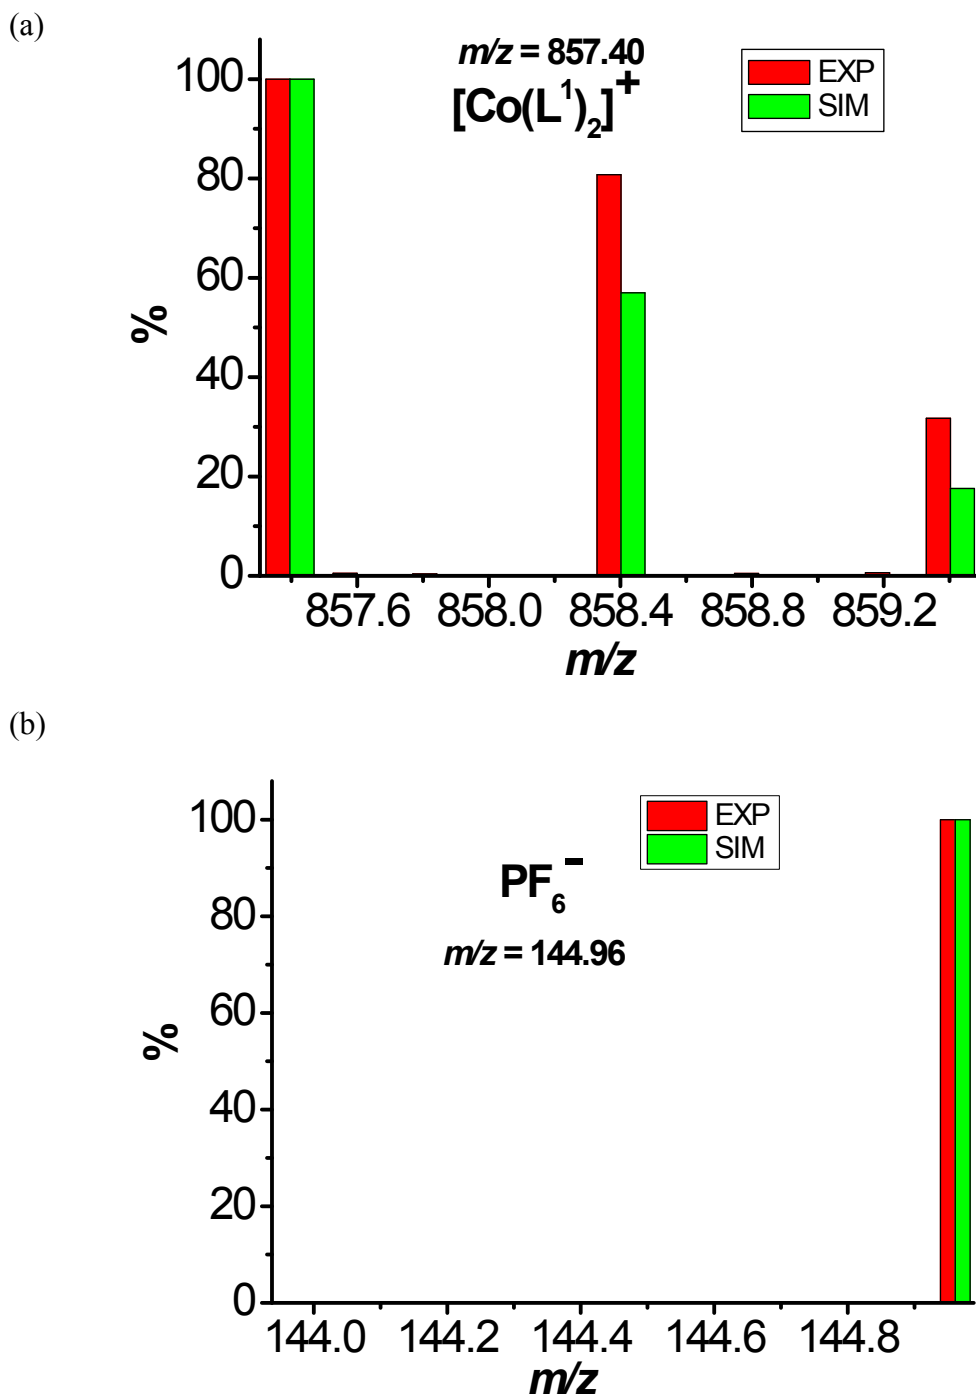

**Fig. S5** (a) Positive ESI-MS spectrum of  $[\text{Co}(\text{L}^1)_2]^+$  (cationic part) and (b) negative ESI-MS Spectrum of  $\text{PF}_6^-$  (anionic part) of  $[\text{Co}^{\text{III}}(\text{L}^1)_2][\text{PF}_6] \cdot 2\text{CH}_2\text{Cl}_2$  **2**.

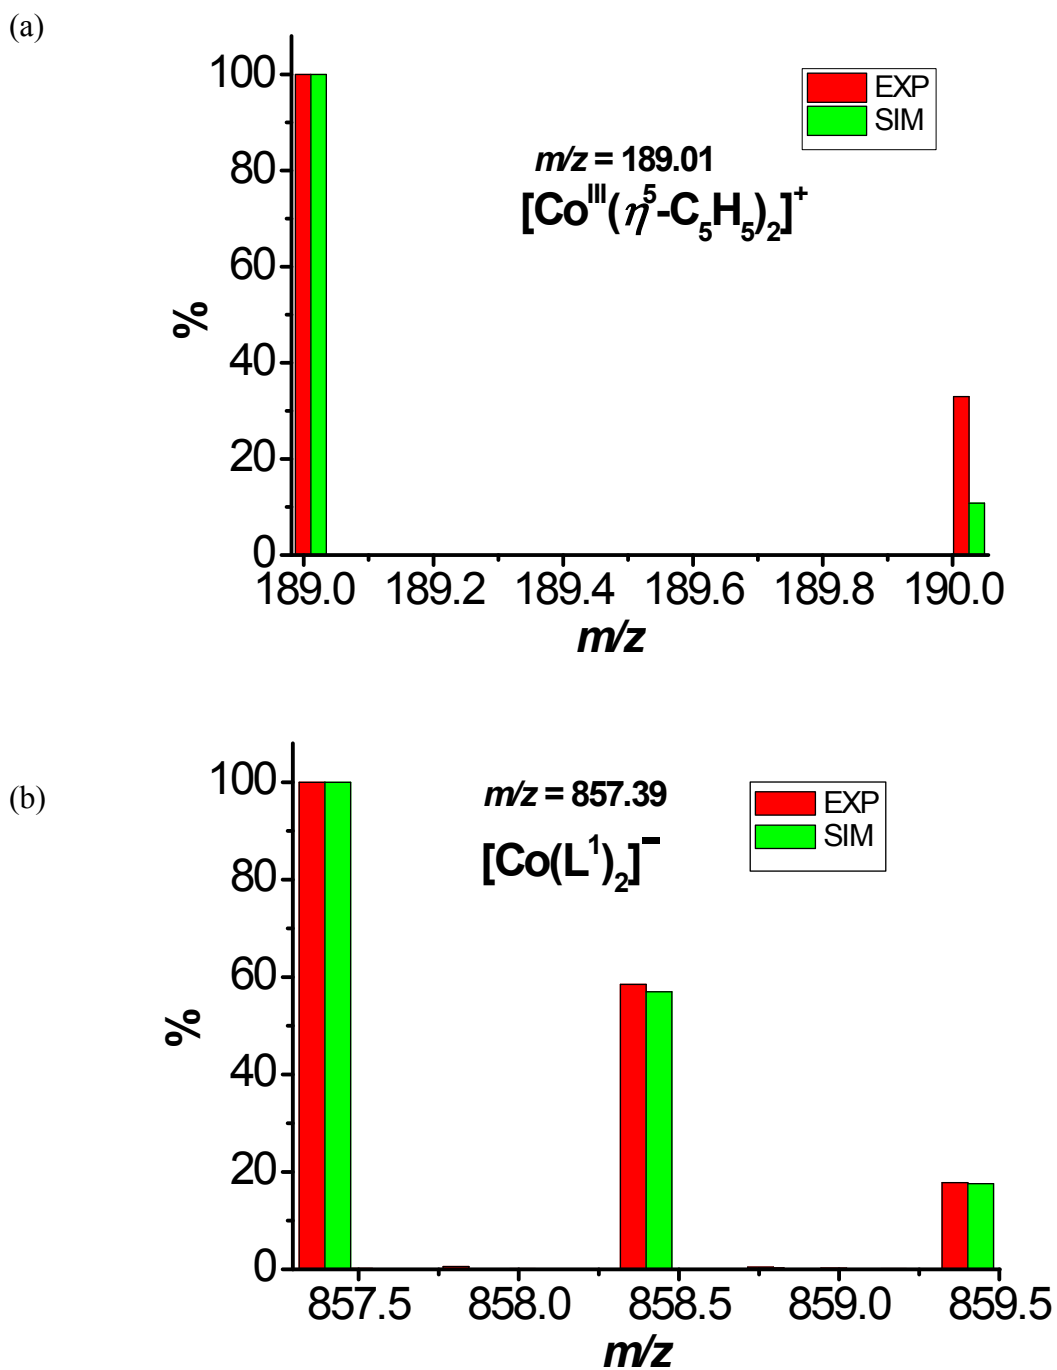

**Fig. S6** (a) Positive ESI-MS spectrum of  $[\text{Co}^{\text{III}}(\eta^5\text{-C}_5\text{H}_5)_2]^+$  (cationic part) and (b) negative ESI-MS spectrum of  $[\text{Co}(\text{L}^1)_2]^-$  (anionic part) of  $[\text{Co}^{\text{III}}(\eta^5\text{-C}_5\text{H}_5)_2]^-[\text{Co}(\text{L}^1)_2]\cdot\text{CH}_3\text{CN}$  3.

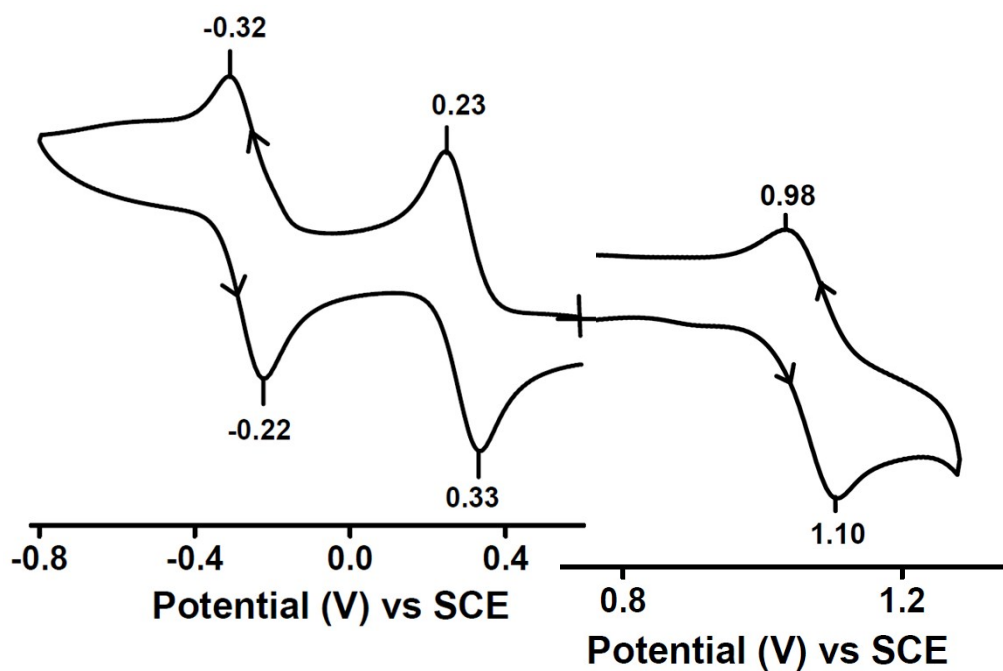

**Fig. S7** Cyclic voltammogram (100 mV/s) of a 1.0 mM solution of  $[\text{Co}(\text{L}^1)_2][\text{PF}_6] \cdot 2\text{CH}_2\text{Cl}_2$  **2** in  $\text{CH}_2\text{Cl}_2$  (0.1 M in TBAP) at a platinum working electrode.

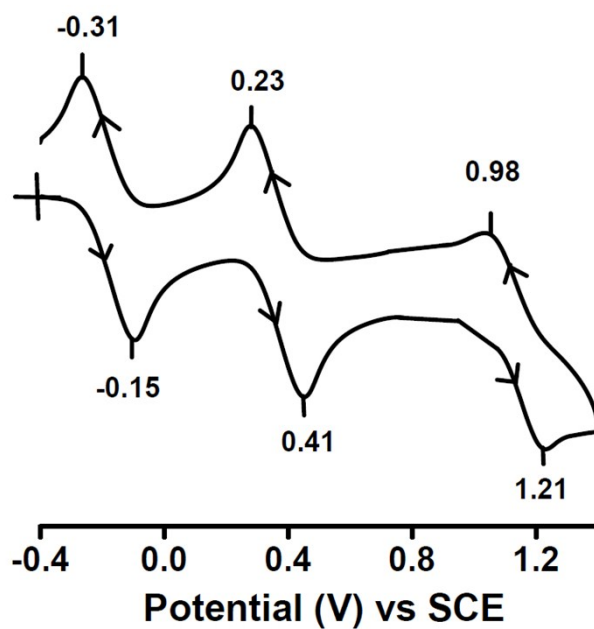

**Fig. S8** Cyclic voltammogram (100 mV/s) of a 1.0 mM solution of  $[\text{Co}^{\text{III}}(\eta^5\text{-C}_5\text{H}_5)_2][\text{Co}(\text{L}^1)_2] \cdot \text{CH}_3\text{CN}$  **3** in  $\text{CH}_2\text{Cl}_2$  (0.1 M in TBAP) at a platinum working electrode.

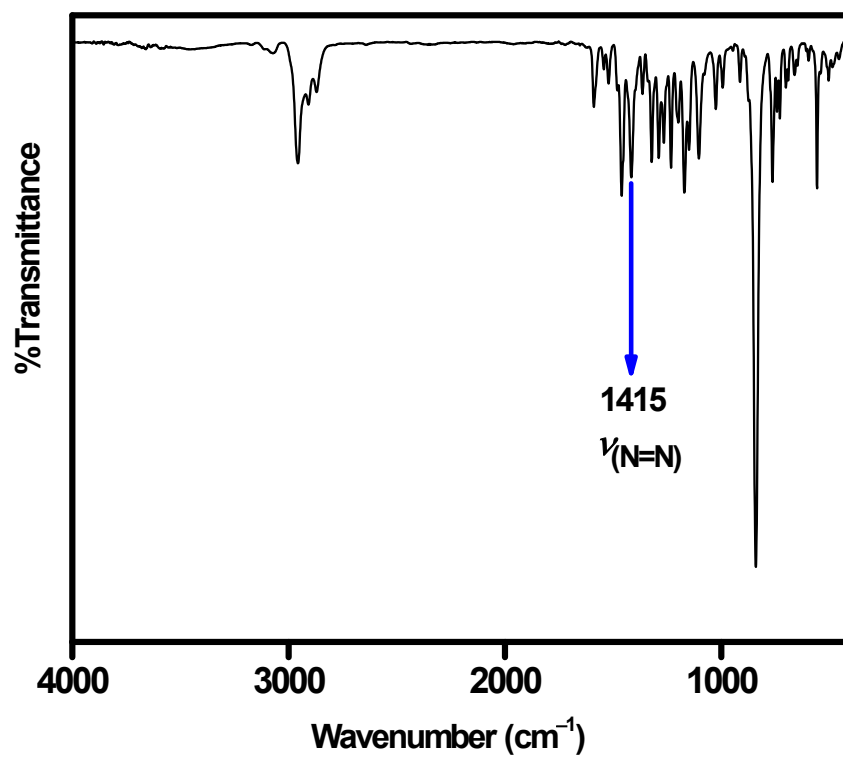

Fig. S9 IR spectrum of [Co(L<sup>1</sup>)<sub>2</sub>][PF<sub>6</sub>] $\cdot$ 2CH<sub>2</sub>Cl<sub>2</sub> 2.

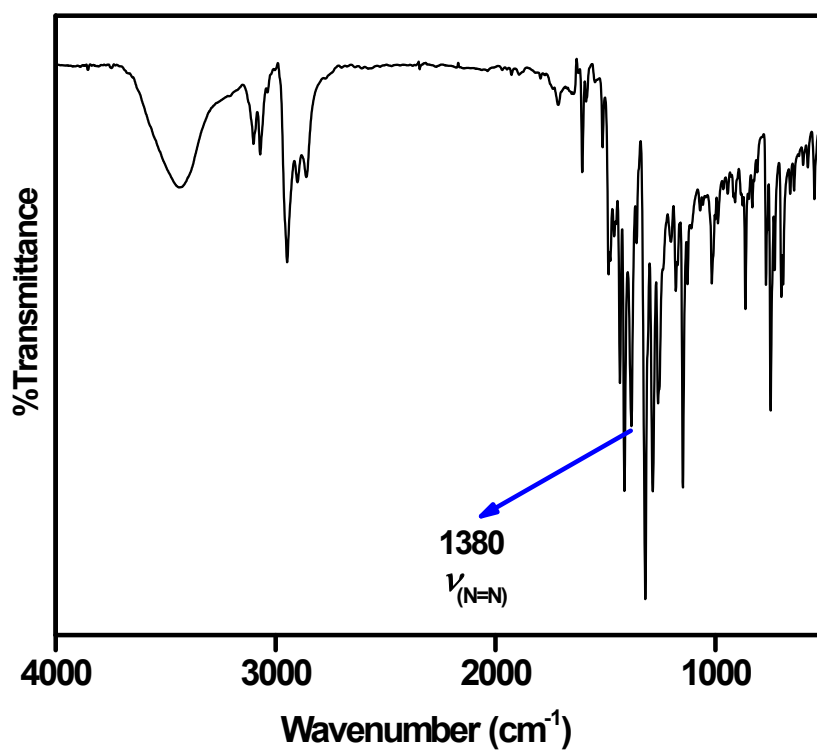

Fig. S10 IR spectrum of [Co<sup>III</sup>( $\eta^5$ -C<sub>5</sub>H<sub>5</sub>)<sub>2</sub>][Co(L<sup>1</sup>)<sub>2</sub>]MeCN 3.



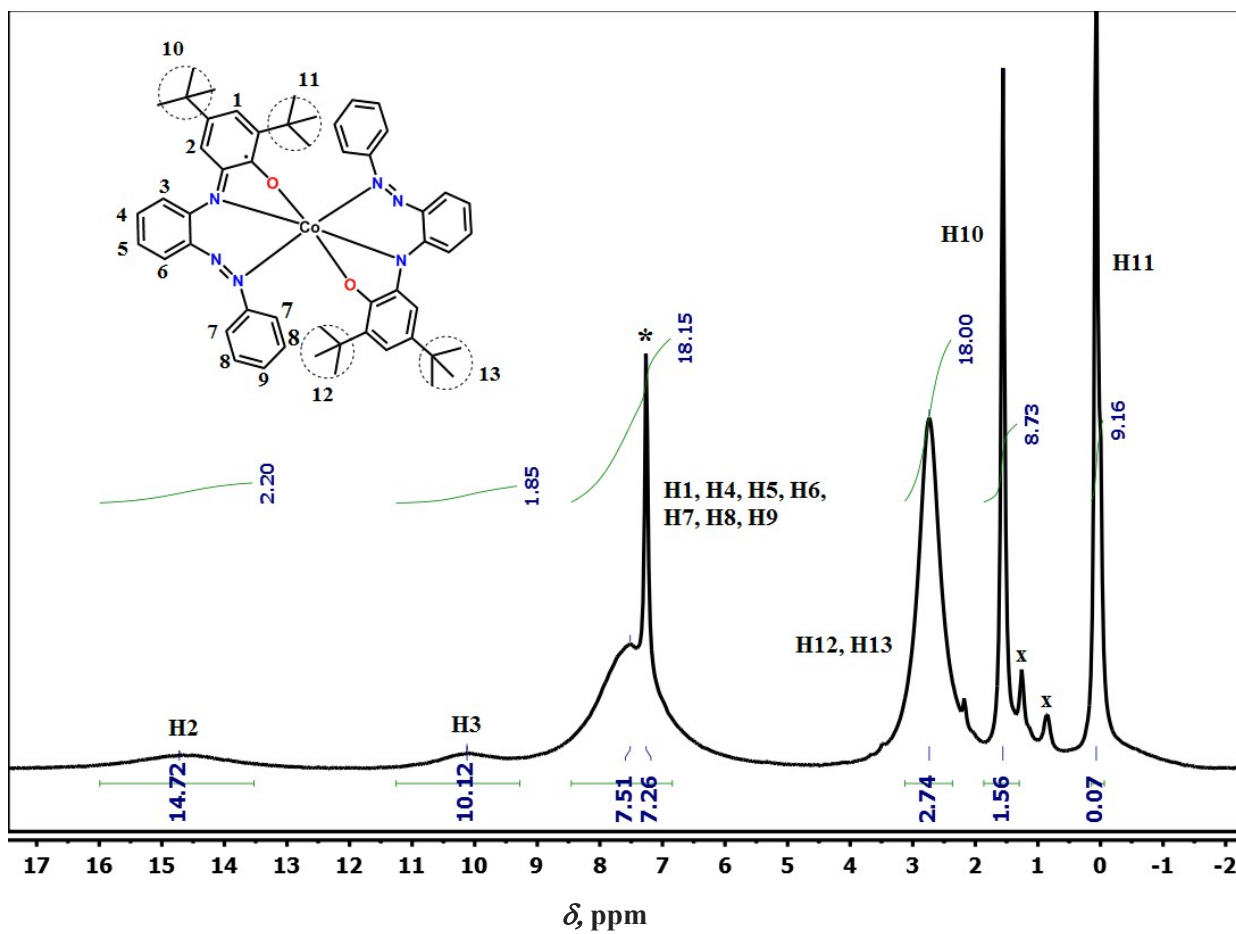

**Fig. S11**  $^1\text{H}$  NMR spectrum (400 MHz,  $\text{CDCl}_3$ ) of  $[\text{Co}(\text{L}^1)_2]$  **1** at 298 K. Peak denoted by \* and x are due to  $\text{CHCl}_3$  and solvent impurity, respectively.

downfield shift

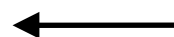

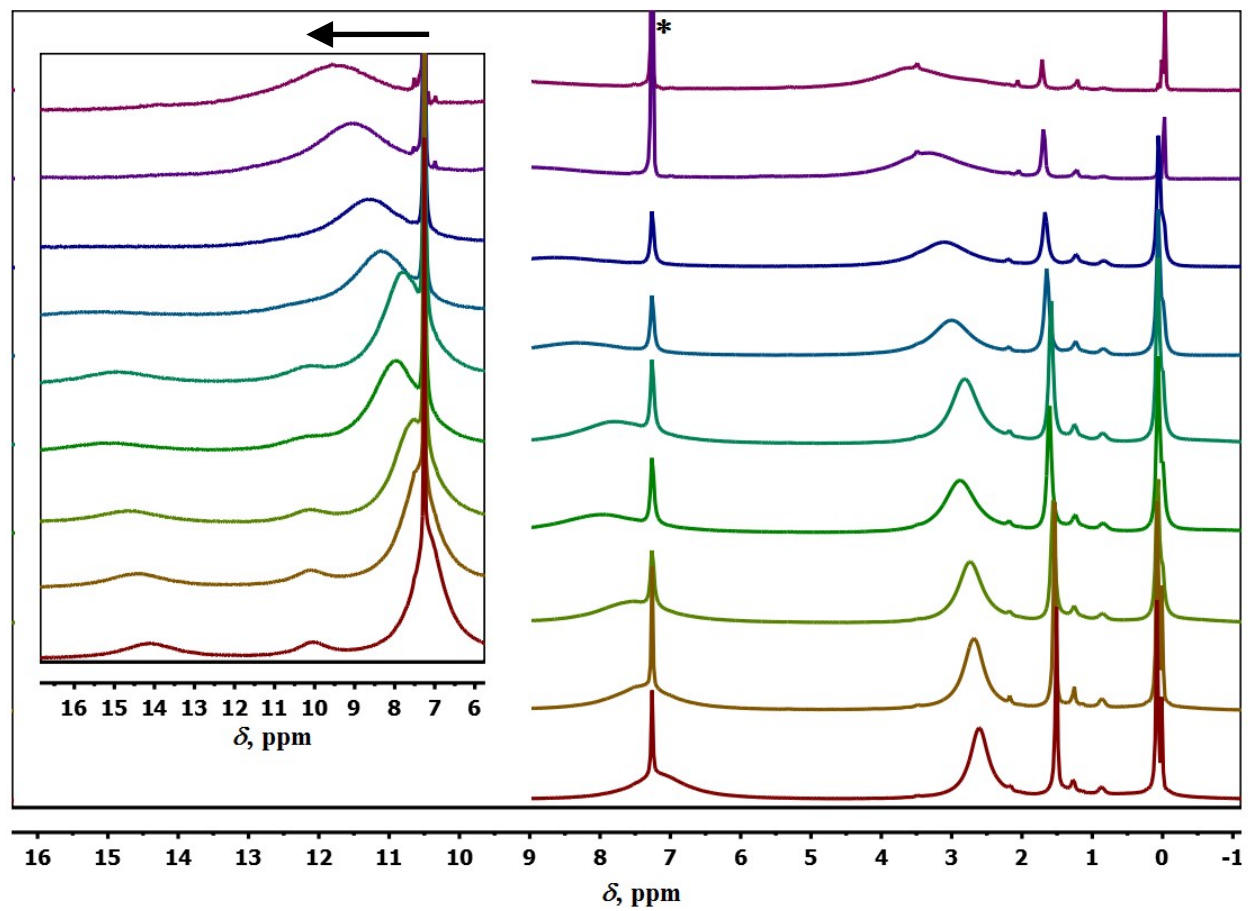

Fig. S12 Variable Temperature (233-313 K)  $^1\text{H}$  NMR spectrum (400 MHz,  $\text{CDCl}_3$ ) of  $[\text{Co}(\text{L}^1)_2]$  **1**.

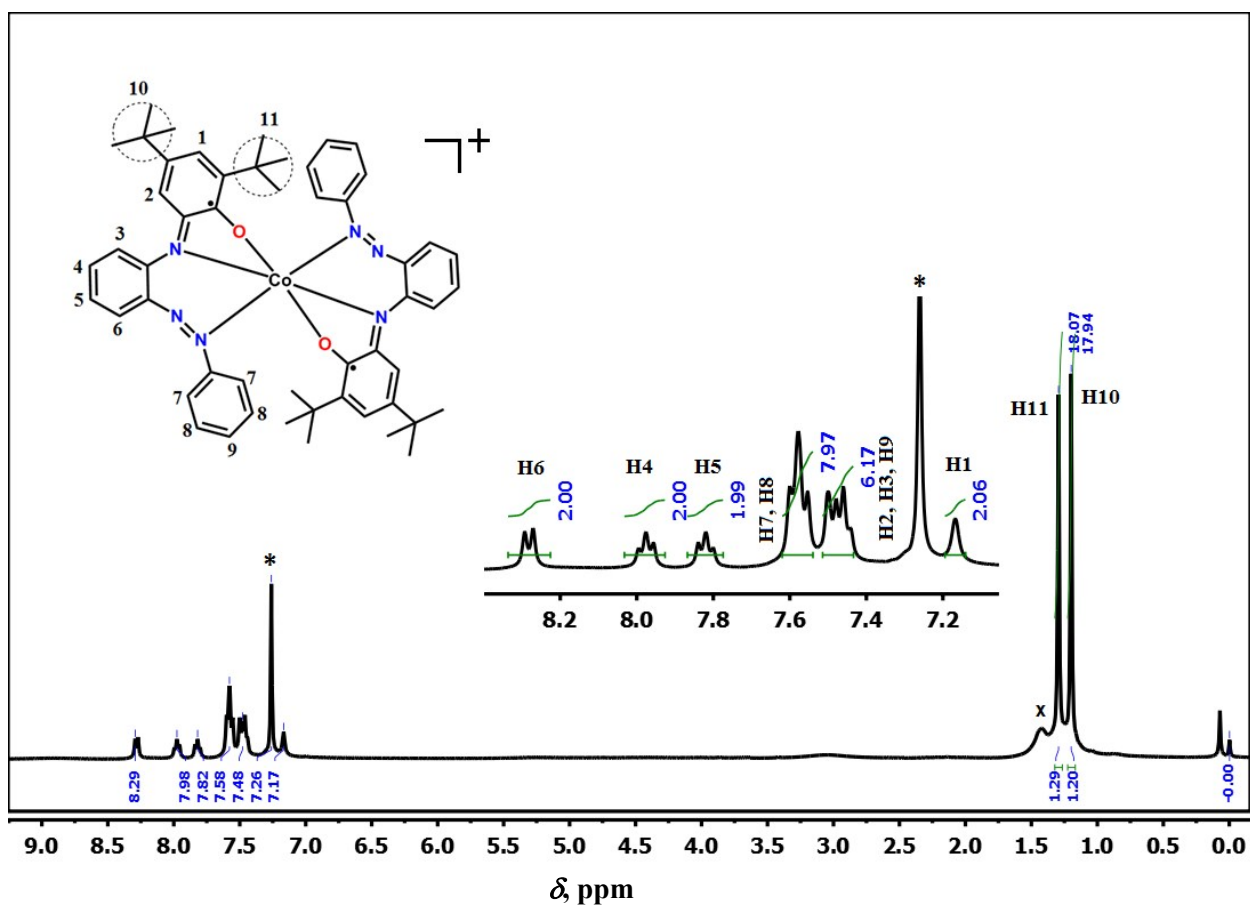

**Fig. S13**  $^1\text{H}$  NMR spectrum (400 MHz,  $\text{CDCl}_3$ ) of  $[\text{Co}(\text{L}^1)_2][\text{PF}_6] \cdot 2\text{CH}_2\text{Cl}_2$  2 at 298 K. Peaks denoted by \* and x are due to  $\text{CHCl}_3$  and  $\text{H}_2\text{O}$  respectively.

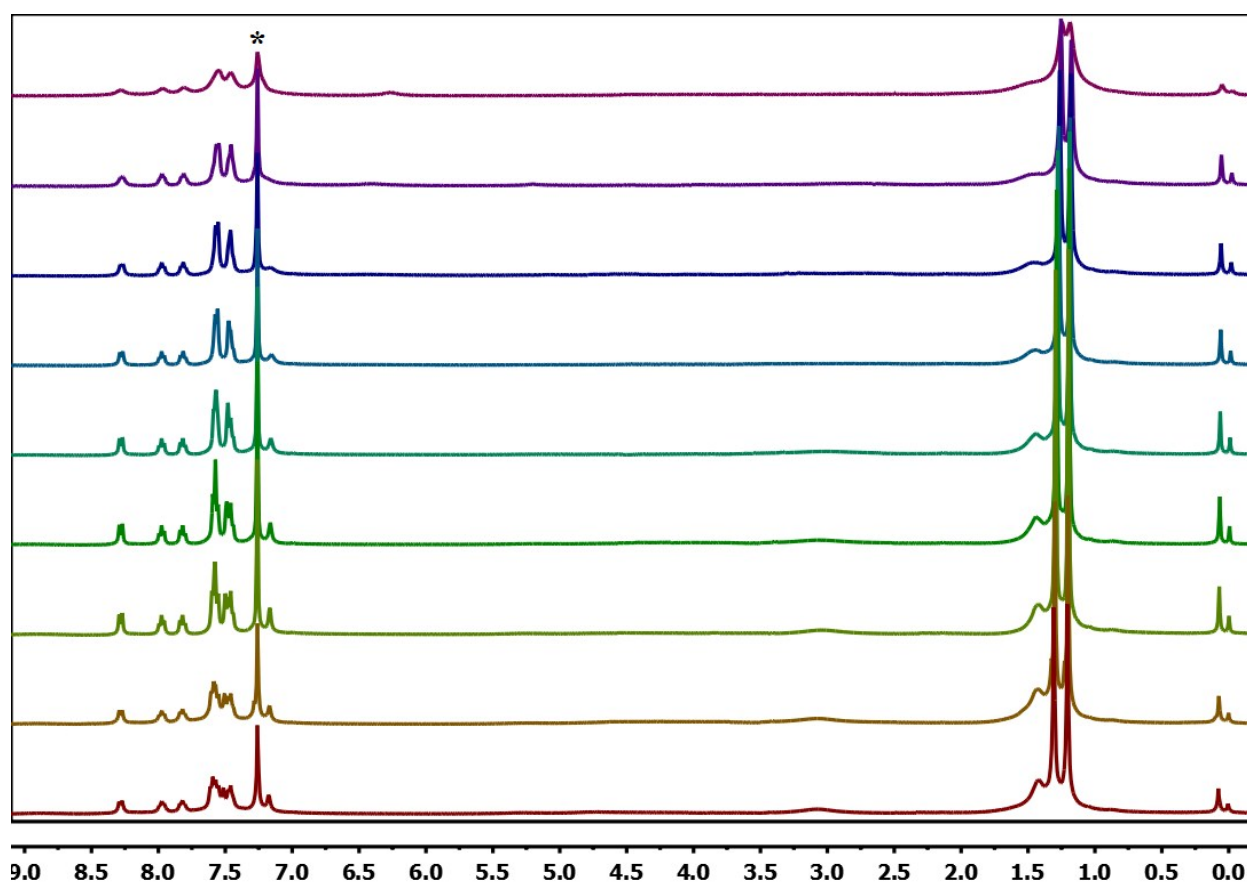

233 K

273 K

313 K

$\delta$ , ppm

**Fig. S14** Variable Temperature (233-313 K)  $^1\text{H}$  NMR spectrum (400 MHz,  $\text{CDCl}_3$ ) of  $[\text{Co}(\text{L}^1)_2][\text{PF}_6]\cdot 2\text{CH}_2\text{Cl}_2$  **2**.

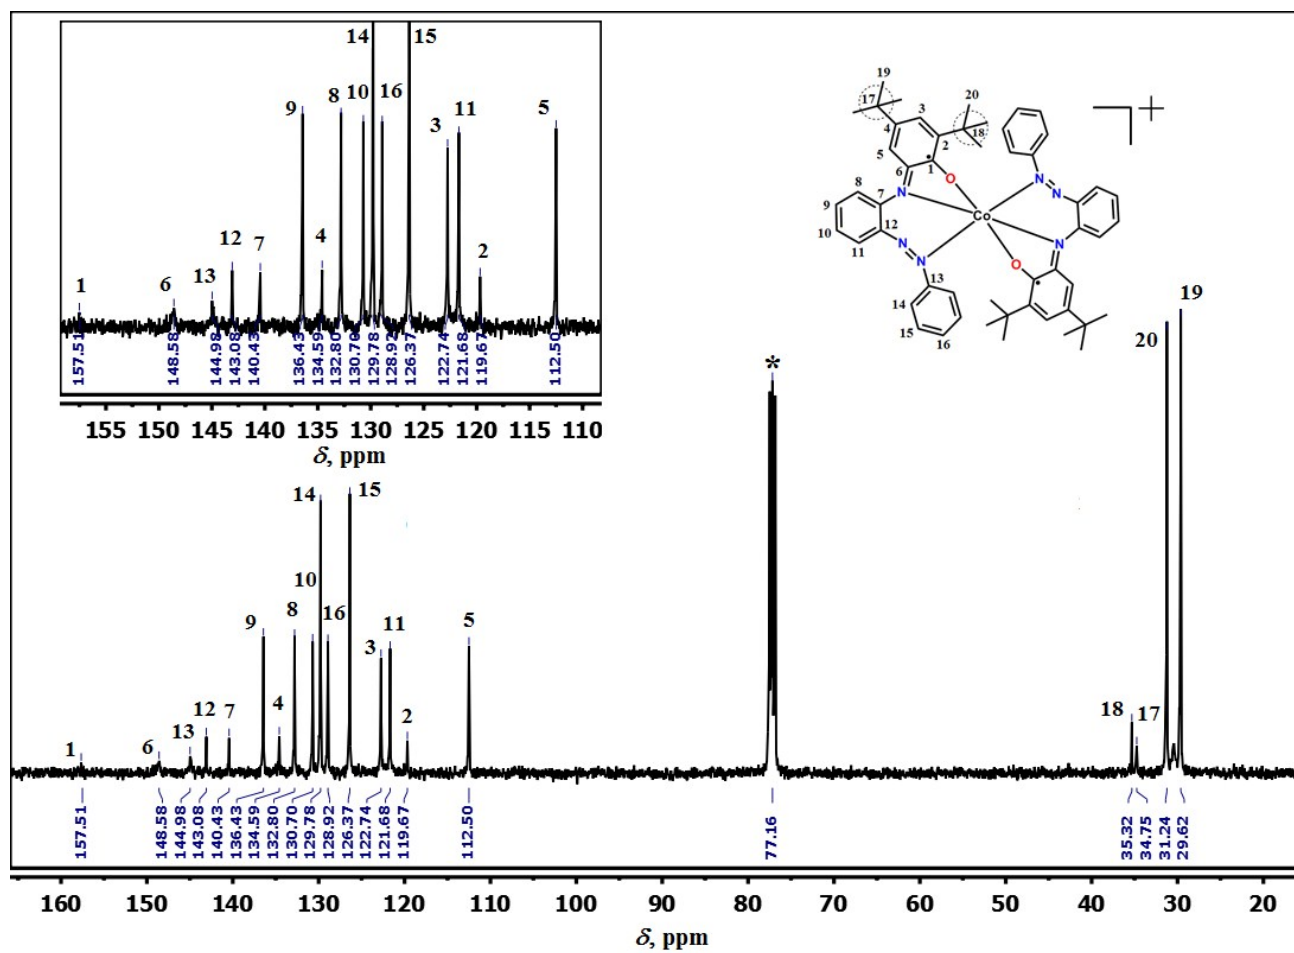

**Fig. S15**  $^{13}\text{C}$  NMR spectrum (400 MHz,  $\text{CDCl}_3$ ) of  $[\text{Co}(\text{L}^1)_2][\text{PF}_6]_2 \cdot 2\text{CH}_2\text{Cl}_2$  **2** at 298 K. Peak denoted by \* is due to  $\text{CHCl}_3$ .

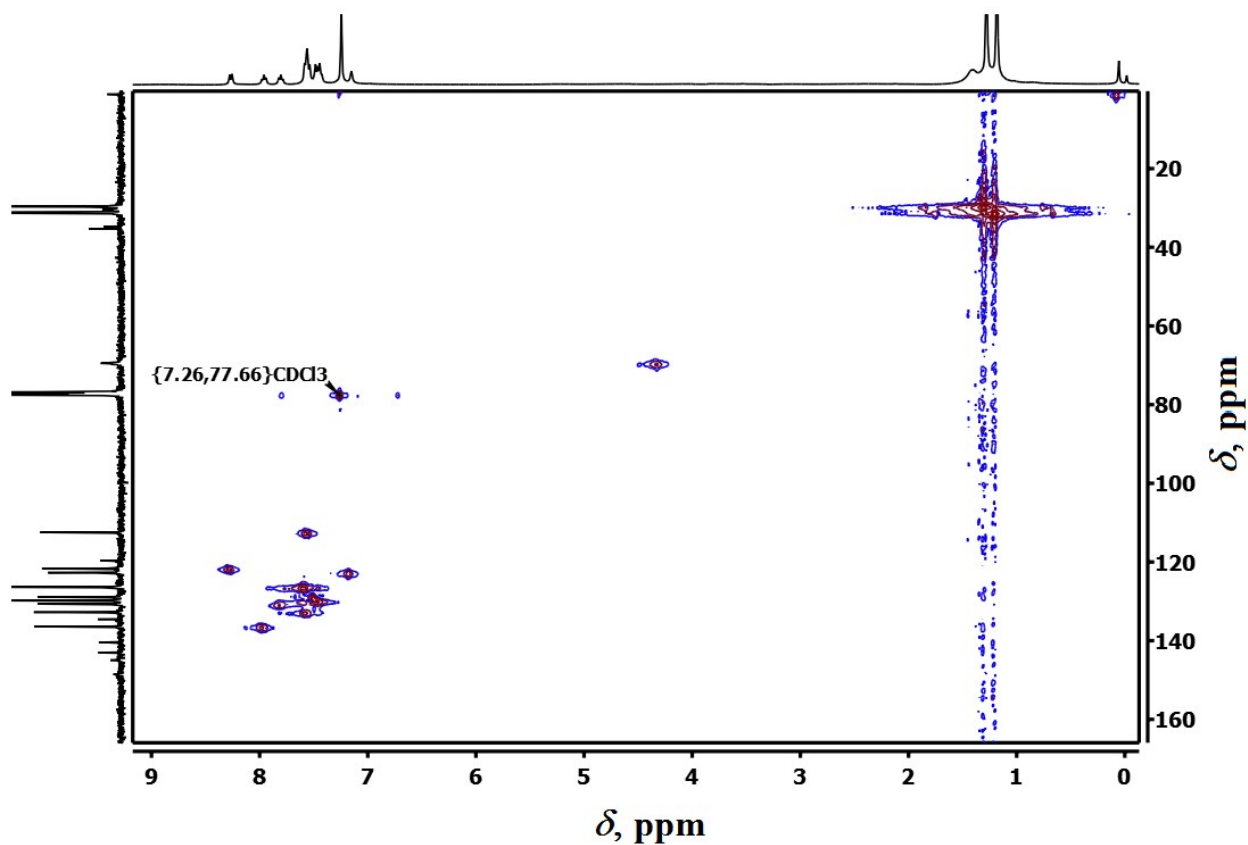

**Fig. S16** 2D HMQC (Heteronuclear Multiple Quantum Coherence) of (400 MHz, CDCl<sub>3</sub>) [Co(L<sup>1</sup>)<sub>2</sub>][PF<sub>6</sub>]<sub>2</sub>·2CH<sub>2</sub>Cl<sub>2</sub> **2**.

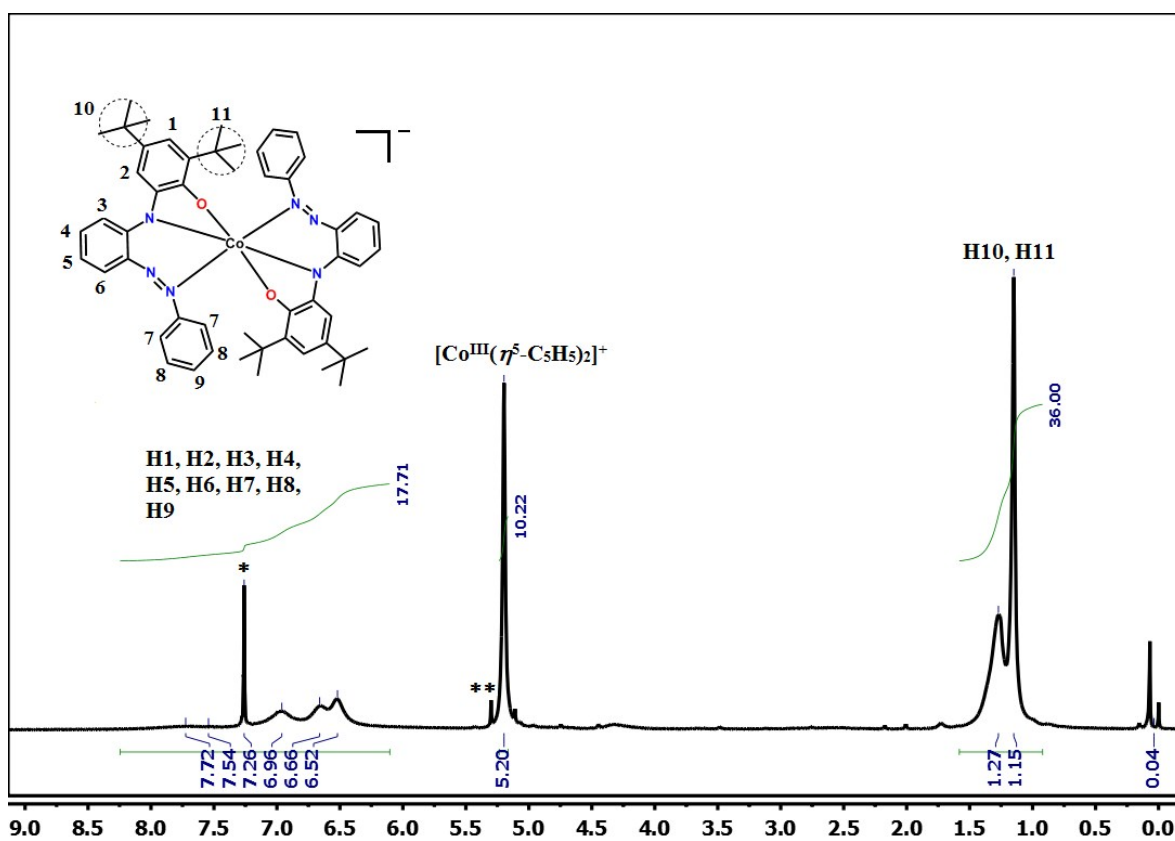

$\delta$ , ppm

**Fig. S17**  $^1\text{H}$  NMR spectrum (400 MHz,  $\text{CDCl}_3$ ) of  $[\text{Co}^{\text{III}}(\eta^5\text{-C}_5\text{H}_5)_2][\text{Co}(\text{L}^1)_2]$  **3** 298 K. Peaks denoted by \* and \*\* are due to  $\text{CHCl}_3$  and  $\text{CH}_2\text{Cl}_2$ , respectively

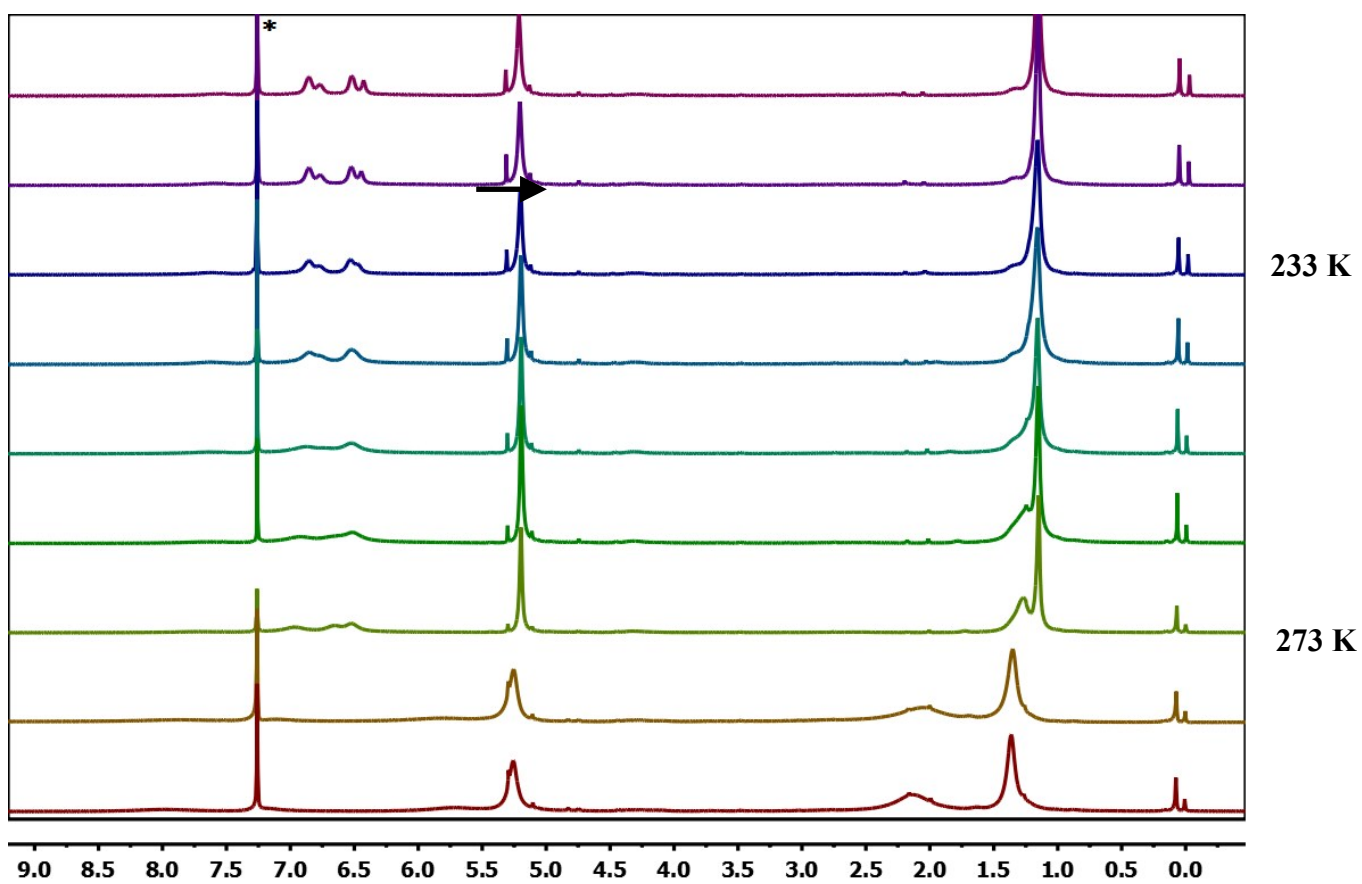

$\delta$ , ppm

**Fig. S18** Variable Temperature (233-313 K)  $^1\text{H}$  NMR spectrum (400 MHz,  $\text{CDCl}_3$ ) of  $[\text{Co}^{\text{III}}(\eta^5\text{-C}_5\text{H}_5)_2][\text{Co}(\text{L}^1)_2]$  **3**.

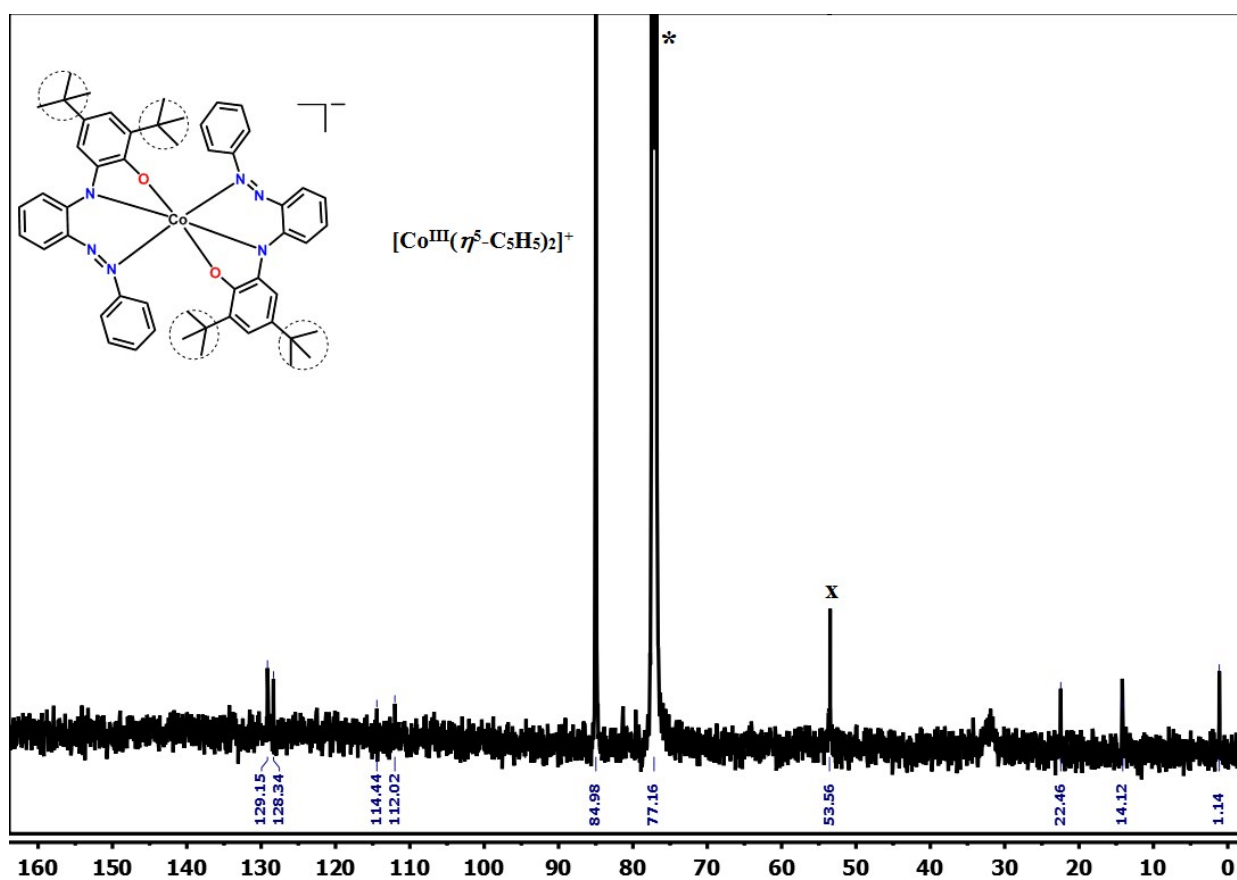



$\delta$ , ppm

**Fig. S19**  $^{13}\text{C}$  NMR spectrum (400 MHz,  $\text{CDCl}_3$ ) of  $[\text{Co}^{\text{III}}(\eta^5\text{-C}_5\text{H}_5)_2][\text{Co}(\text{L}^1)_2]$  **3** 298 K. Peaks denoted by \* and x are due to  $\text{CHCl}_3$  and  $\text{CH}_2\text{Cl}_2$ .

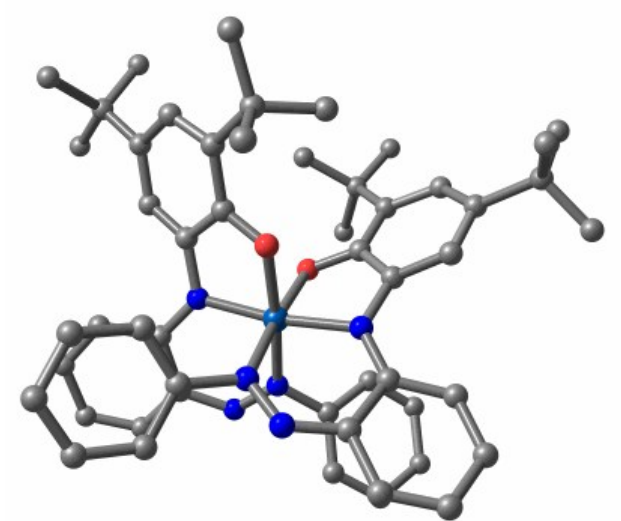

**Fig. S20.** Optimized-structure for  $[1]^{1-}$ , where no spin-population is found.

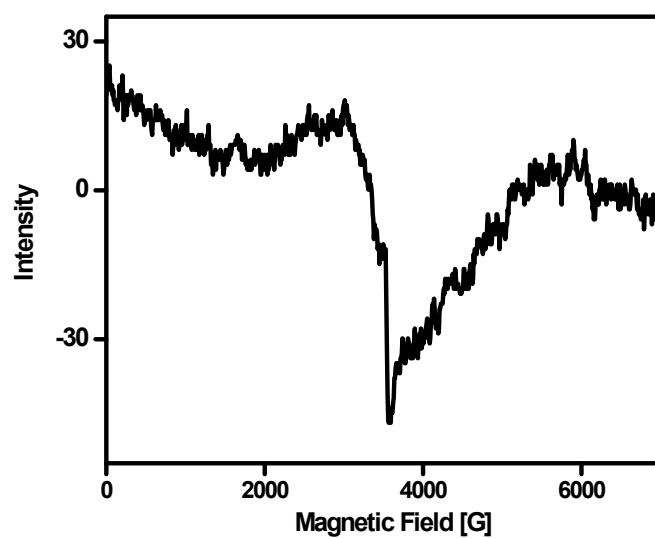

**Fig. S21** X-band EPR spectra recorded for  $[\text{Co}^{\text{III}}(\eta^5\text{-C}_5\text{H}_5)_2][\text{Co}(\text{L}^1)_2]\text{MeCN}$  **3** as solid (298 K);  $g_{\text{iso}} = 2.0053$ .

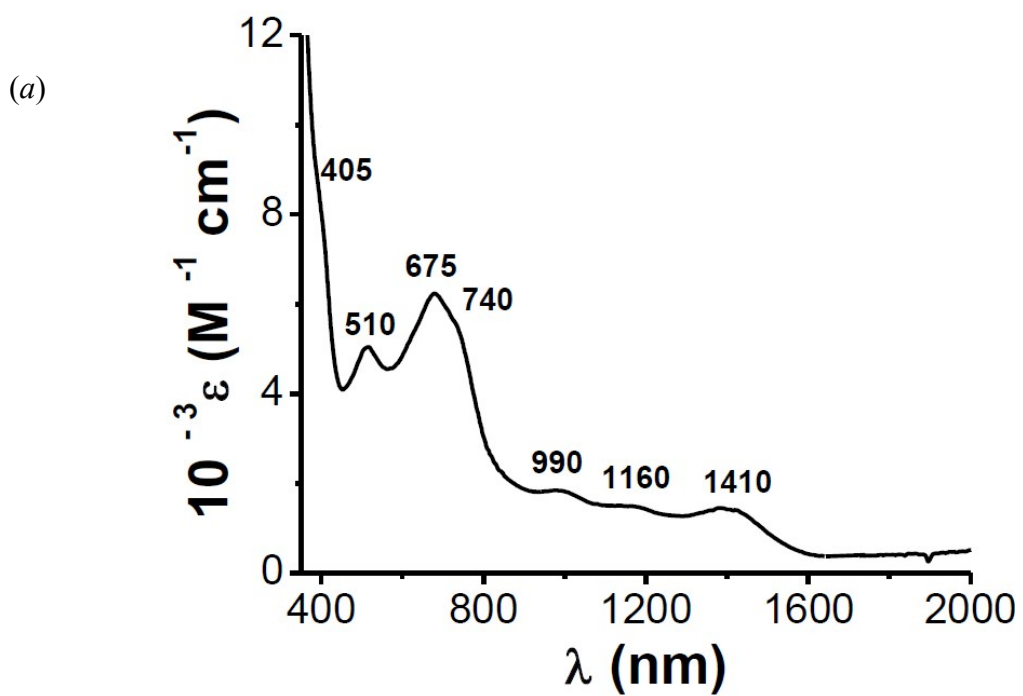

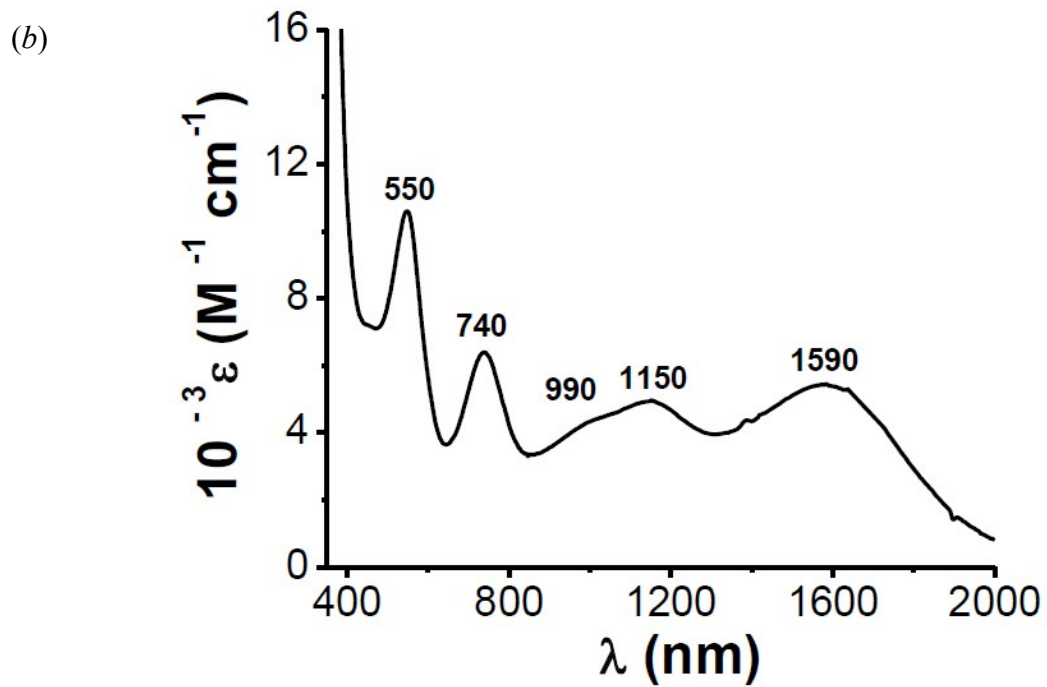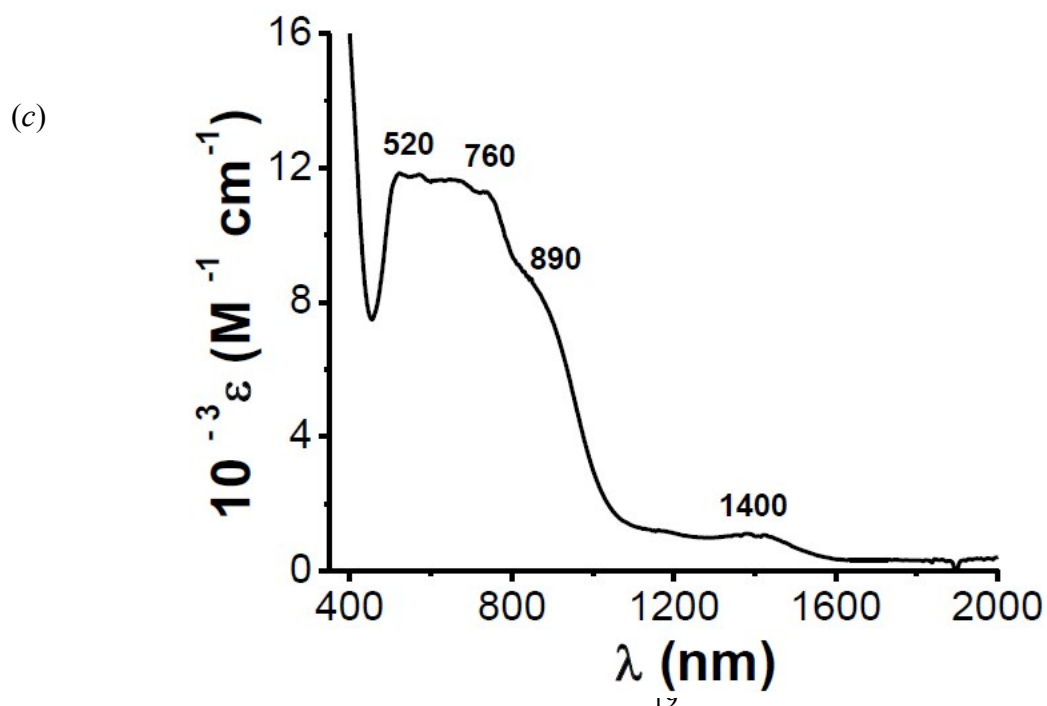

**Fig. S22.** UV-VIS-NIR spectra of (a)  $[\text{Co}(\text{L}^1)_2]$  **1**, (b)  $[\text{Co}(\text{L}^1)_2][\text{PF}_6] \cdot 2\text{CH}_2\text{Cl}_2$  **2** and (c)  $[\text{Co}^{\text{III}}(\eta^5\text{-C}_5\text{H}_5)_2][\text{Co}(\text{L}^1)_2] \cdot \text{MeCN}$  **3** in  $\text{CH}_2\text{Cl}_2$ .

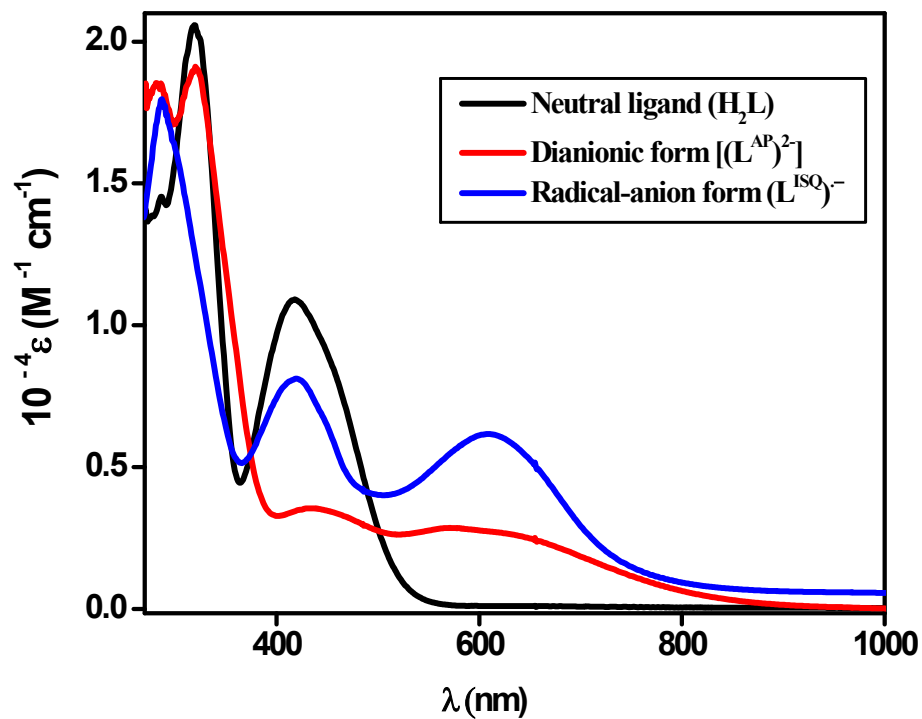

**Fig. S23** Absorption spectral measurements on ligand in neutral, dianionic and radical-anion forms recorded in  $\text{CH}_2\text{Cl}_2$ .

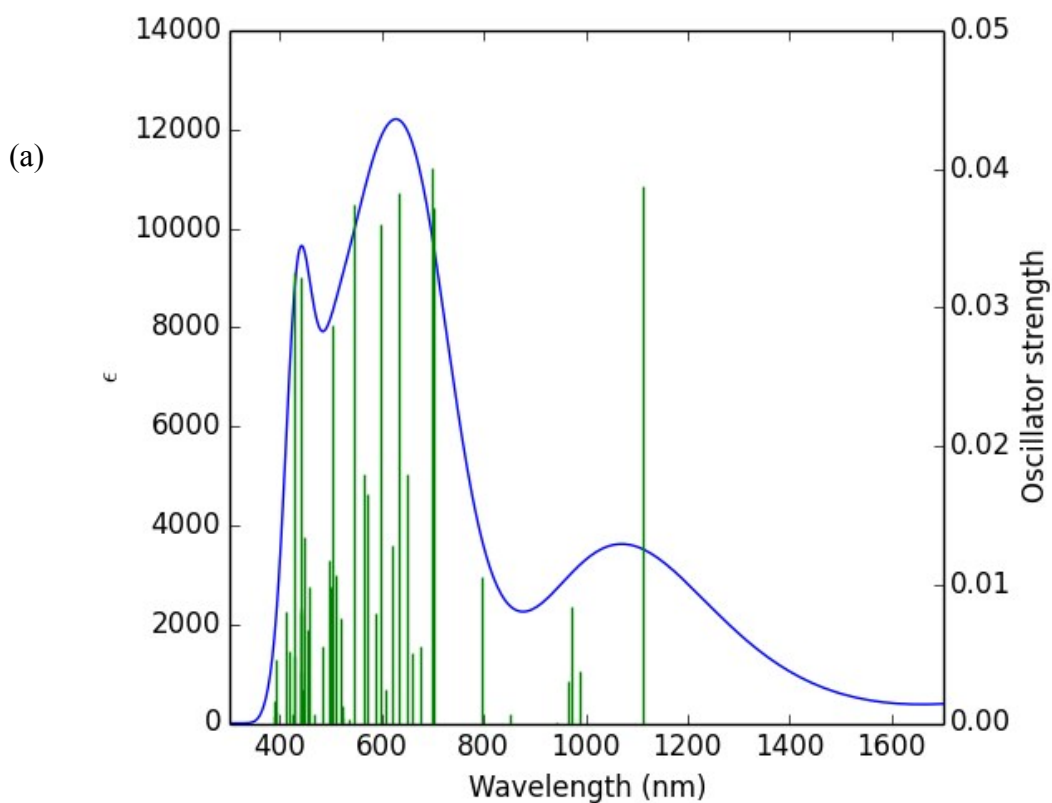

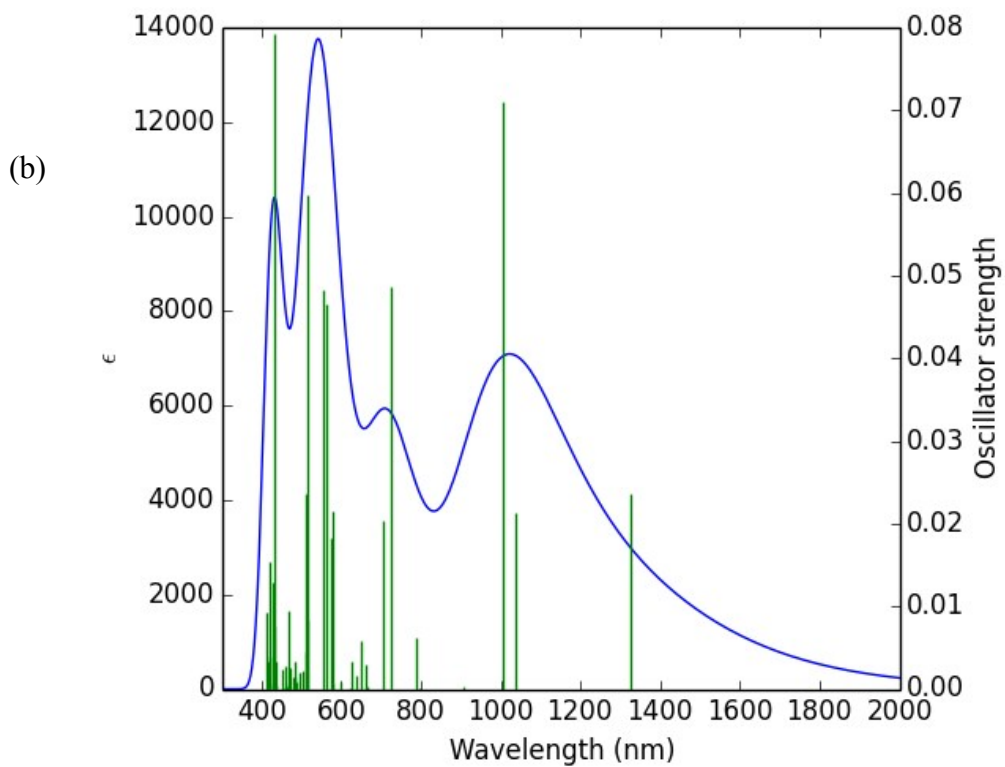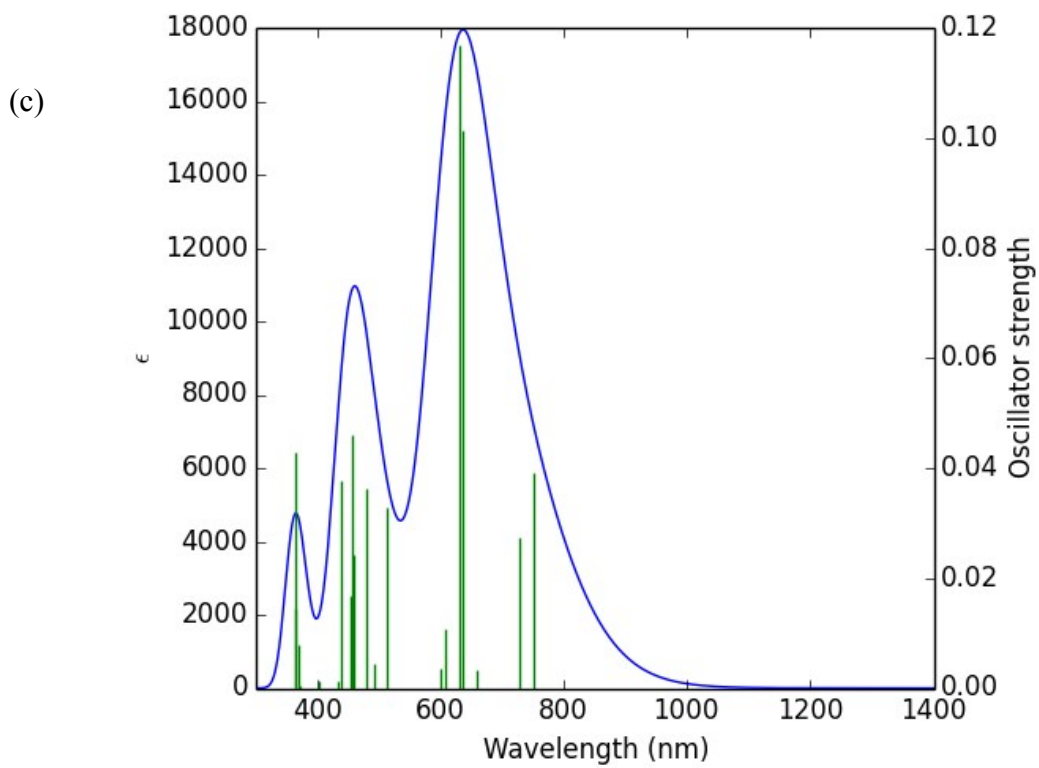

Fig. S24 TD-DFT-Calculated electronic spectra of (a) **1**, (b)  $[1]^{1+}$ , and (c)  $[1]^{1-}$ .

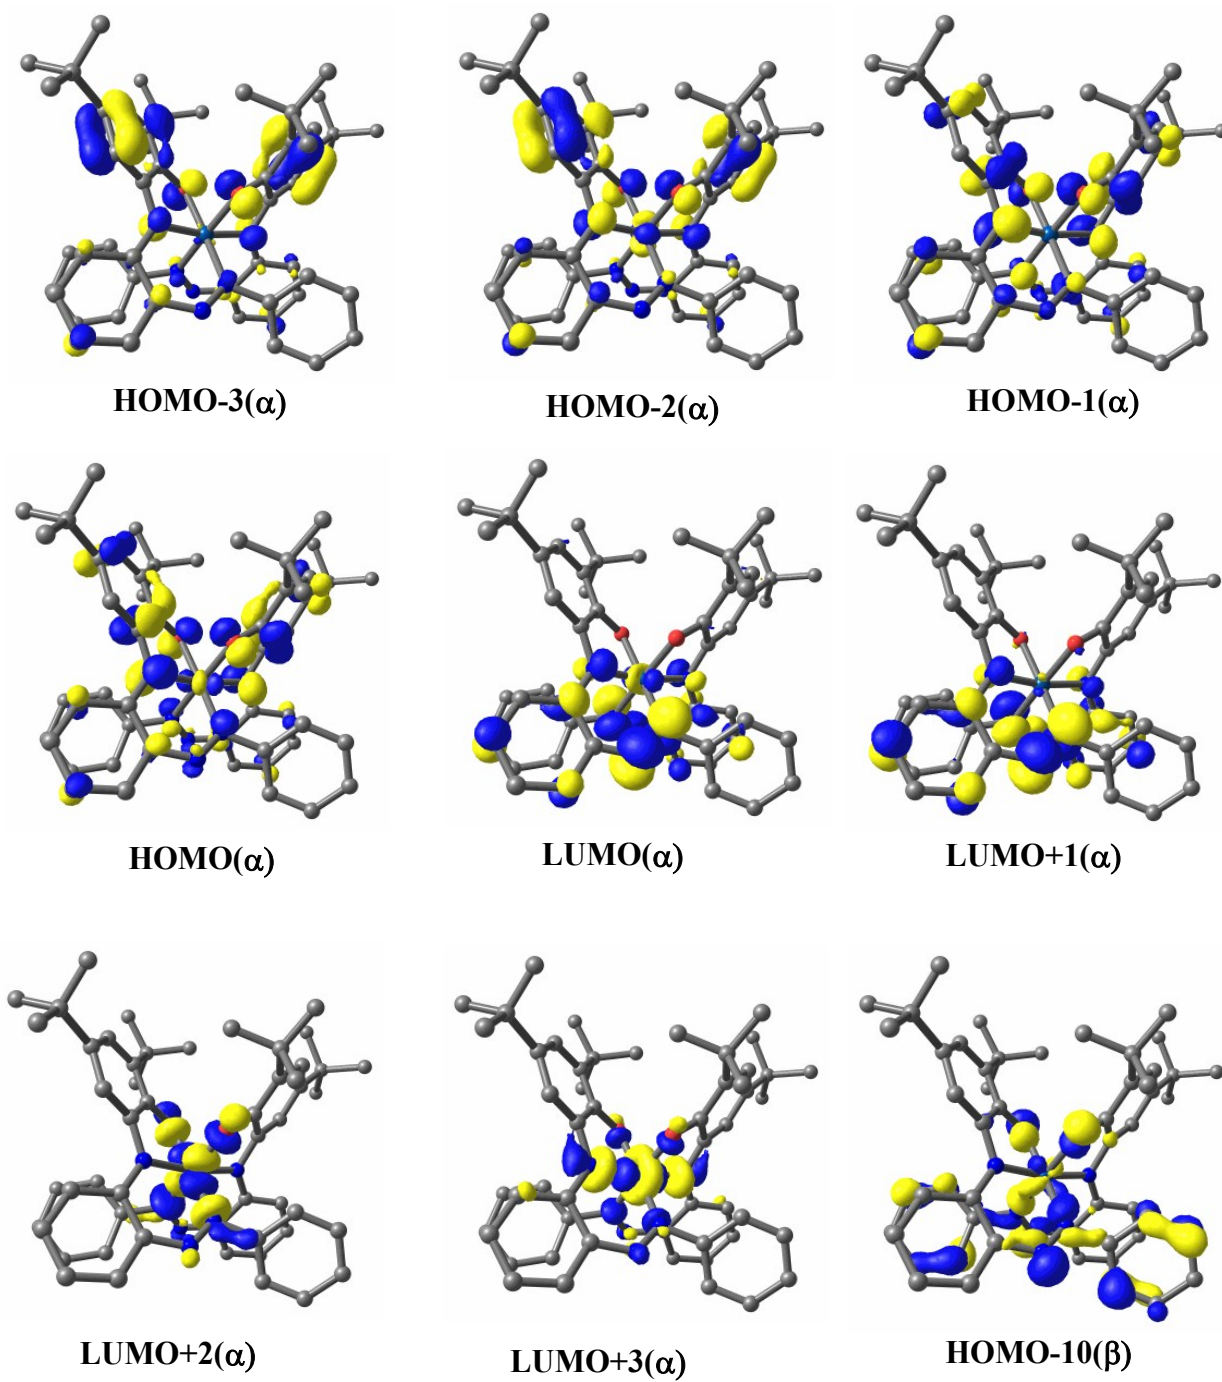

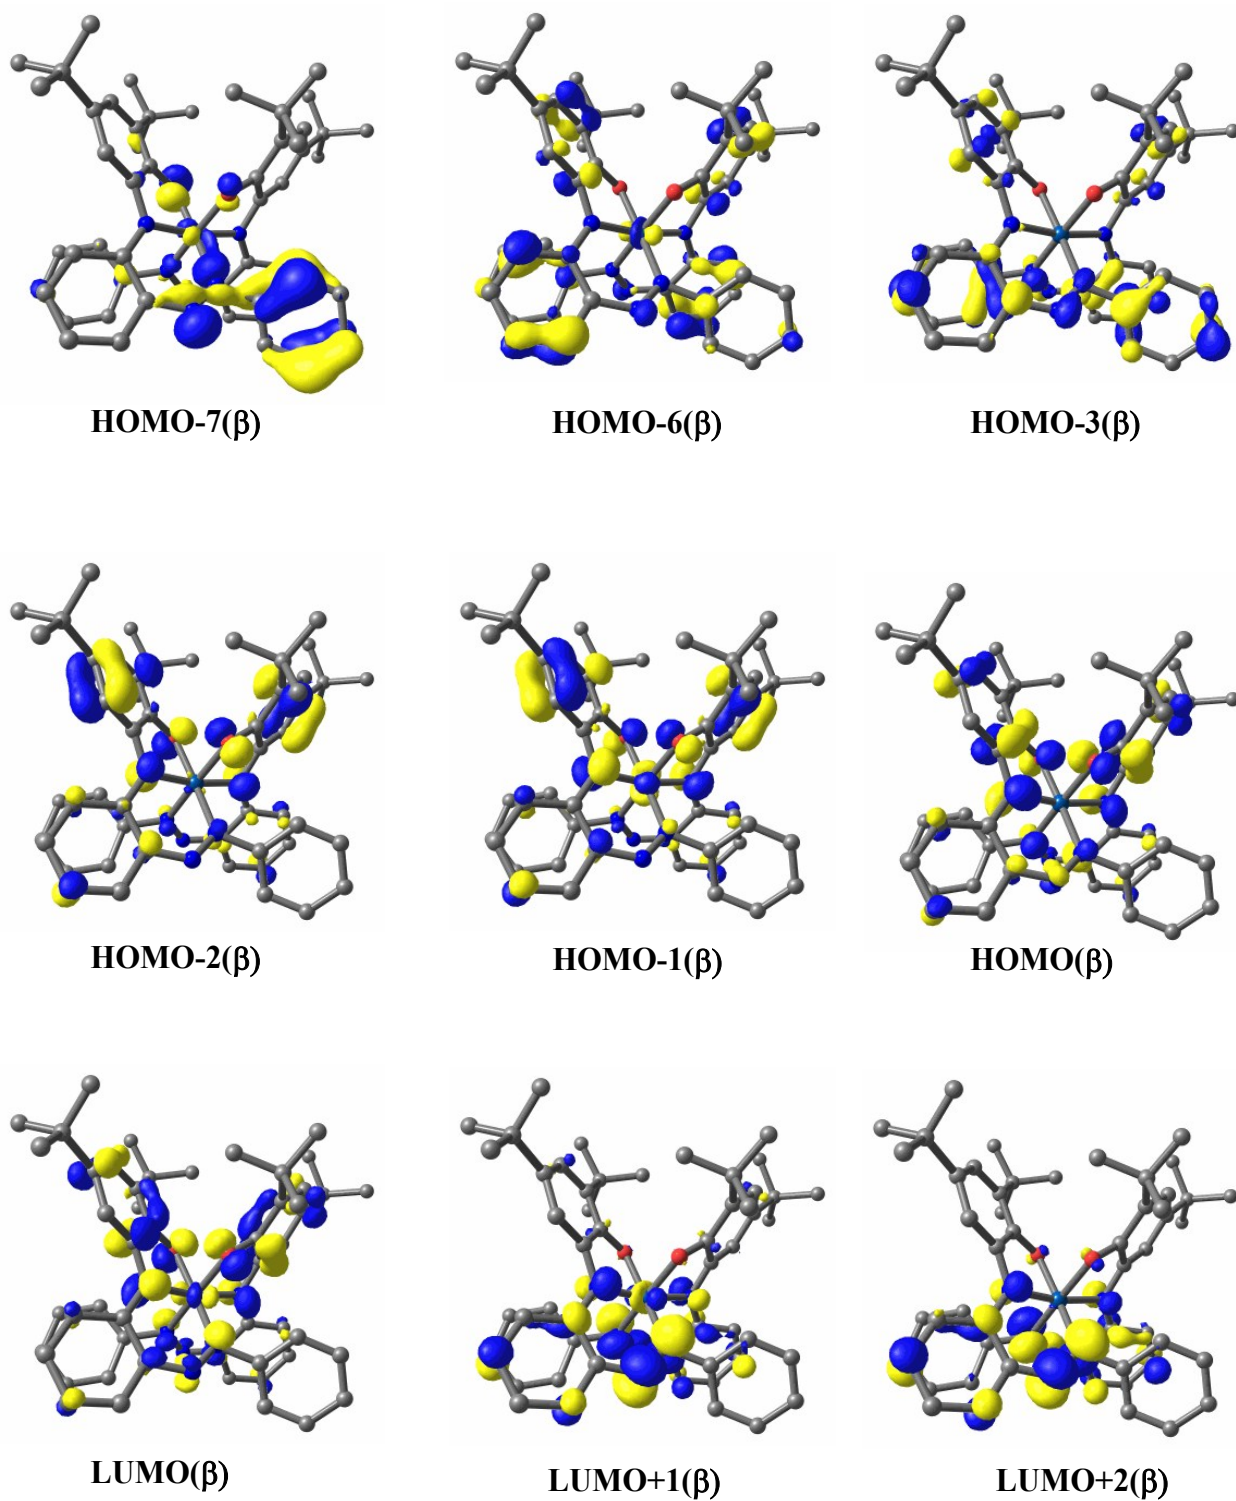

Fig. S25 Representative molecular-orbitals involved in TD-DFT transitions of 1.





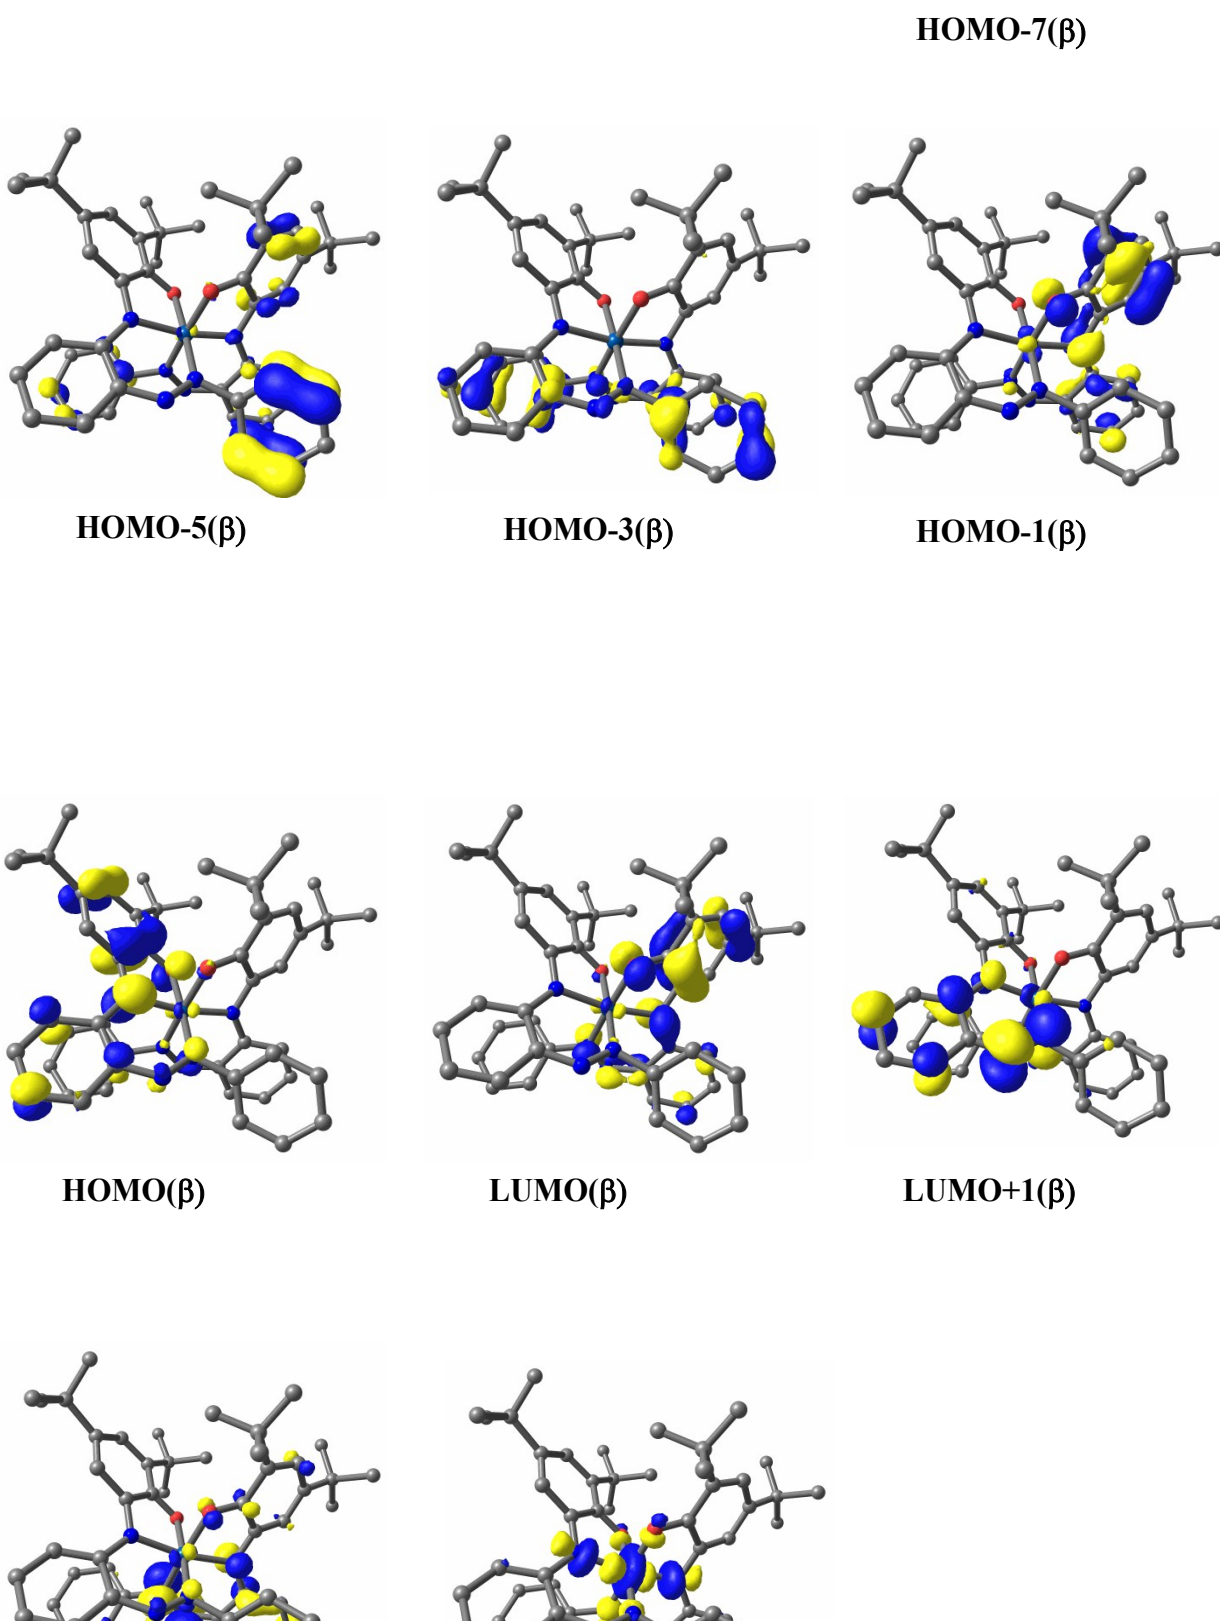

**Fig. S26** Representative molecular-orbitals involved in TD-DFT transitions of  $[1]^{1+}$ .

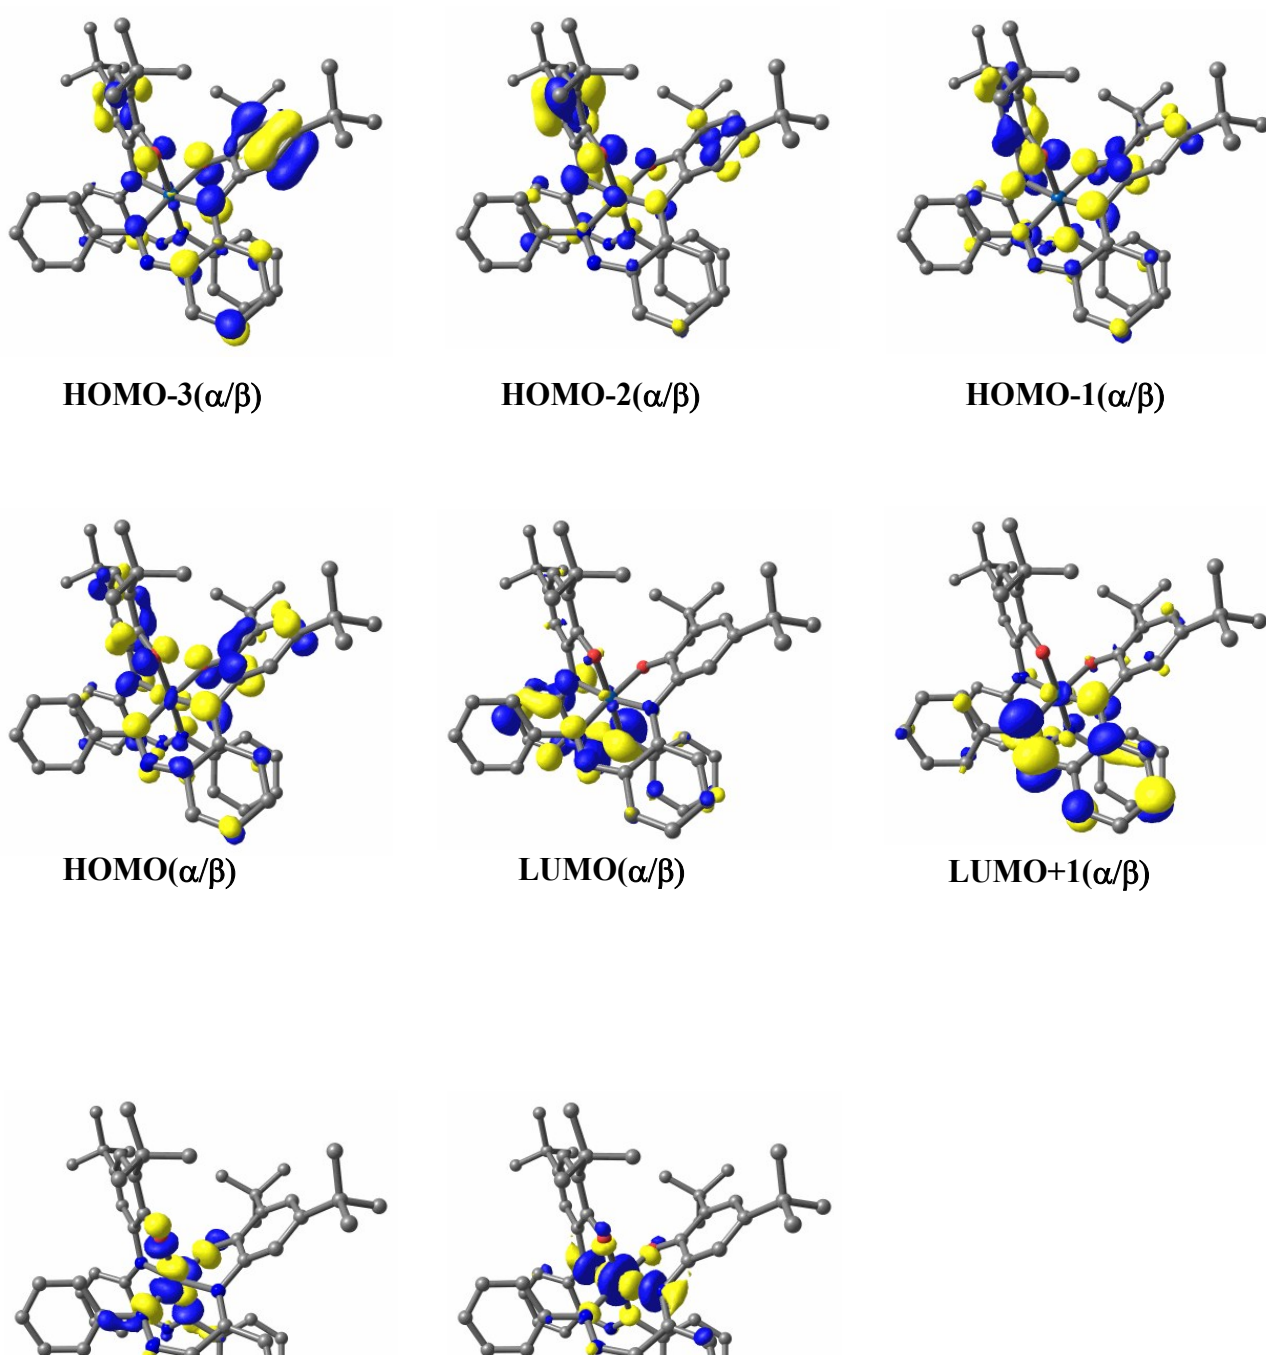

**Fig. S27** Representative molecular-orbitals involved in TD-DFT transitions of [1]<sup>1-</sup>.

**Table S1.** Data collection and structure refinement parameters for [Co(L<sup>1</sup>)<sub>2</sub>] **1**, [Co(L<sup>1</sup>)<sub>2</sub>][PF<sub>6</sub>]<sub>2</sub>·2CH<sub>2</sub>Cl<sub>2</sub> **2** and [Co<sup>III</sup>(η<sup>5</sup>-C<sub>5</sub>H<sub>5</sub>)<sub>2</sub>][Co(L<sup>1</sup>)<sub>2</sub>]<sub>2</sub>·MeCN **3**.

|                                                                    | <b>1</b>                                                        | <b>2</b>                                                                                         | <b>3</b>                                                                      |
|--------------------------------------------------------------------|-----------------------------------------------------------------|--------------------------------------------------------------------------------------------------|-------------------------------------------------------------------------------|
| Empirical formula                                                  | C <sub>52</sub> H <sub>58</sub> CoN <sub>6</sub> O <sub>2</sub> | C <sub>54</sub> H <sub>62</sub> Cl <sub>4</sub> CoF <sub>6</sub> N <sub>6</sub> O <sub>2</sub> P | C <sub>64</sub> H <sub>71</sub> Co <sub>2</sub> N <sub>7</sub> O <sub>2</sub> |
| Formula weight                                                     | 857.97                                                          | 1172.80                                                                                          | 1088.13                                                                       |
| Crystal color, habit                                               | black, prism                                                    | black, block                                                                                     | black, block                                                                  |
| Temperature (K)                                                    | 100(2)                                                          | 100(2)                                                                                           | 100(2)                                                                        |
| Wavelength (Å)                                                     | 0.71073                                                         | 0.71073                                                                                          | 0.71073                                                                       |
| Crystal system                                                     | Orthorhombic                                                    | Trigonal                                                                                         | Orthorhombic                                                                  |
| Space group                                                        | <i>Pca</i> 2 <sub>1</sub>                                       | <i>R</i> 3c                                                                                      | <i>Pna</i> 2 <sub>1</sub>                                                     |
| Crystal size (mm <sup>3</sup> )                                    | 0.10 x 0.08 x 0.06                                              | 0.18 x 0.14 x 0.10                                                                               | 0.1 x 0.07 x 0.05                                                             |
| <i>a</i> (Å)                                                       | 22.556(5)                                                       | 31.315(5)                                                                                        | 22.6297(14)                                                                   |
| <i>b</i> (Å)                                                       | 12.003(2)                                                       | 31.315(5)                                                                                        | 14.1505(9)                                                                    |
| <i>c</i> (Å)                                                       | 16.456(3)                                                       | 29.732(5)                                                                                        | 17.5120(11)                                                                   |
| $\alpha$ (°)                                                       | 90.0                                                            | 90.0                                                                                             | 90.0                                                                          |
| $\beta$ (°)                                                        | 90.0                                                            | 90.0                                                                                             | 90.0                                                                          |
| $\gamma$ (°)                                                       | 90.0                                                            | 120.0                                                                                            | 90.0                                                                          |
| Volume (Å <sup>3</sup> )                                           | 4455.1(16)                                                      | 25250(7)                                                                                         | 5607.7(6)                                                                     |
| <i>Z</i>                                                           | 4                                                               | 18                                                                                               | 4                                                                             |
| Density <sub>calc</sub> (g cm <sup>-3</sup> )                      | 1.28                                                            | 1.39                                                                                             | 1.289                                                                         |
| $\mu$ (mm <sup>-1</sup> )                                          | 0.433                                                           | 0.395                                                                                            | 0.642                                                                         |
| no. reflns collcd                                                  | 22478                                                           | 53813                                                                                            | 28318                                                                         |
| no. unique reflns                                                  | 6811( <i>R</i> <sub>int</sub> = 0.0823)                         | 6646 ( <i>R</i> <sub>int</sub> = 0.1120)                                                         | 8128( <i>R</i> <sub>int</sub> = 0.0706)                                       |
| no. reflns used [ <i>I</i> > 2σ( <i>I</i> )]                       | 5683                                                            | 4223                                                                                             | 6689                                                                          |
| Goodness-of-fit on <i>F</i> <sup>2</sup>                           | 1.021                                                           | 1.0419                                                                                           | 1.011                                                                         |
| Final <i>R</i> indices [ <i>I</i> > 2σ( <i>I</i> )] <sup>a,b</sup> | 0.0491 (0.1056)                                                 | 0.0786 (0.1985)                                                                                  | 0.0484(0.1049)                                                                |
| <i>R</i> indices (all data) <sup>a,b</sup>                         | 0.0619 (0.1143)                                                 | 0.1038 (0.2197)                                                                                  | 0.0636(0.1125)                                                                |

$${}^a R_1 = \Sigma ||F_o| - |F_c|| / \Sigma |F_o|. \quad {}^b wR_2 = \{ \Sigma [w (|F_o|^2 - |F_c|^2)^2] / \Sigma [w (|F_o|^2)^2] \}^{1/2}.$$

**Table S2.** Comparison of X-ray determined experimental bond lengths with the calculated bond lengths from metrical oxidation state MOS (in parentheses) of  $[\text{Fe}(\text{L}^1)_2]$  and  $[\text{Fe}(\text{L}^1)_2]^+$ .

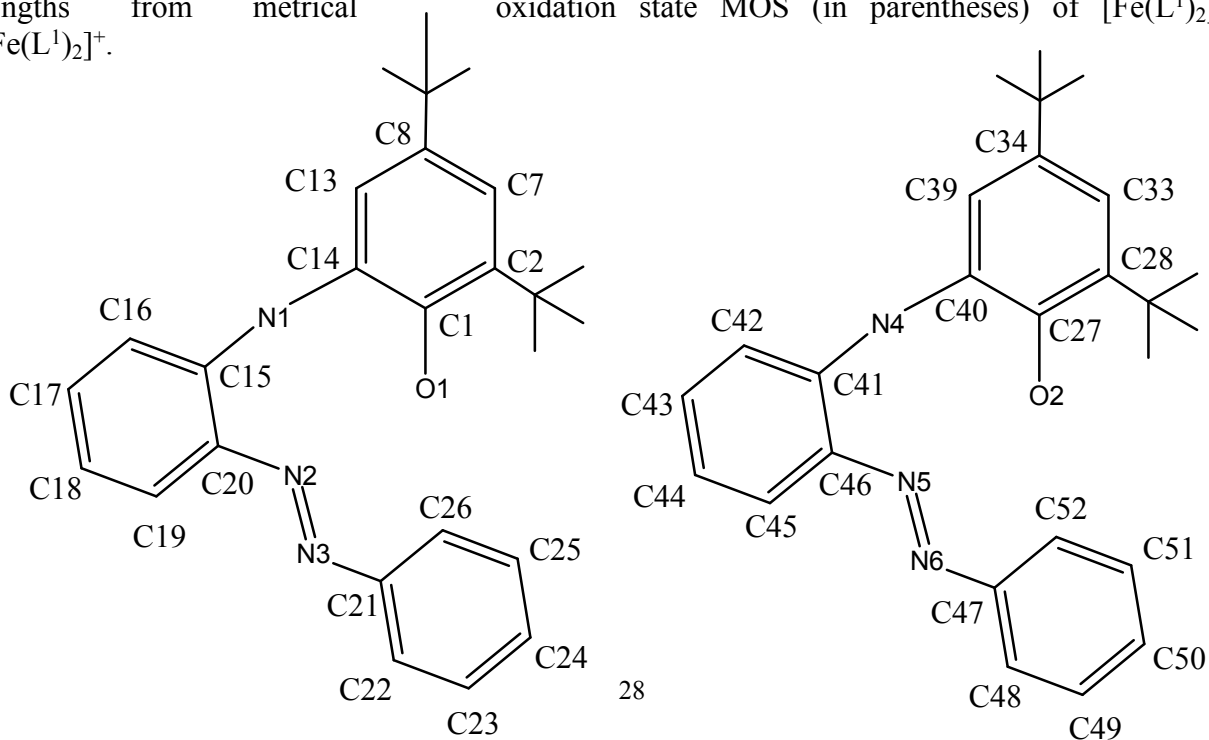

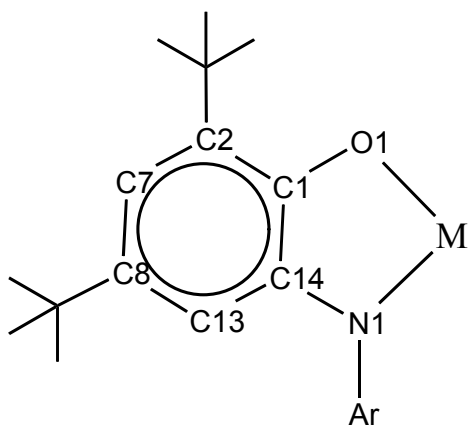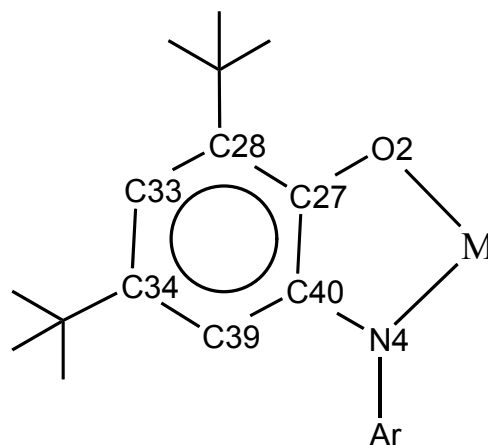

|         | [Fe(L <sup>1</sup> ) <sub>2</sub> ] | [Fe(L <sup>1</sup> ) <sub>2</sub> ] <sup>1+</sup> |
|---------|-------------------------------------|---------------------------------------------------|
| C1–O1   | 1.307(6) [1.312]                    | 1.302(9) [1.291]                                  |
| C1–C2   | 1.439(7) [1.421]                    | 1.439(10) [1.431]                                 |
| C2–C7   | 1.381(8) [1.382]                    | 1.338(8) [1.373]                                  |
| C7–C8   | 1.419(9) [1.421]                    | 1.447(10) [1.434]                                 |
| C8–C13  | 1.383(7) [1.375]                    | 1.377(10) [1.367]                                 |
| C13–C14 | 1.404(7) [1.408]                    | 1.394(10) [1.415]                                 |
| C1–C14  | 1.430(7) [1.435]                    | 1.441(10) [1.452]                                 |
| C14–N1  | 1.364(6) [1.358]                    | 1.368(9) [1.341]                                  |
|         |                                     |                                                   |
| C27–O2  | 1.315(6) [1.334]                    | 1.278(9) [1.295]                                  |
| C27–C28 | 1.440(7) [1.412]                    | 1.453(10) [1.429]                                 |
| C28–C33 | 1.387(7) [1.391]                    | 1.368(11) [1.375]                                 |
| C33–C34 | 1.401(8) [1.408]                    | 1.412(10) [1.432]                                 |

|         |                  |                   |
|---------|------------------|-------------------|
| C34–C39 | 1.404(7) [1.383] | 1.360(10) [1.368] |
| C39–C40 | 1.397(7) [1.401] | 1.414(10) [1.414] |
| C27–C40 | 1.426(7) [1.422] | 1.436(10) [1.448] |
| N1–C40  | 1.402(6) [1.376] | 1.366(9) [1.344]  |

**Table S3.** DFT-optimized coordinates for **1**.

|   |              |              |              |
|---|--------------|--------------|--------------|
| C | -1.121540000 | 2.212832000  | -3.764957000 |
| C | -1.845021000 | 4.489833000  | -3.059007000 |
| C | -3.755984000 | -1.855935000 | -2.969552000 |
| C | -4.219256000 | -3.168213000 | -2.837037000 |
| C | 5.641459000  | 2.599998000  | -2.022656000 |
| C | 3.995157000  | -3.805024000 | -2.310469000 |
| C | -1.166104000 | 3.195770000  | -2.570441000 |
| C | 2.619729000  | -3.777806000 | -2.365033000 |
| C | -2.491157000 | -1.497948000 | -2.495308000 |
| C | -3.403954000 | -4.132080000 | -2.235000000 |
| C | 0.274867000  | 3.550803000  | -2.134405000 |
| C | 4.665727000  | -2.751082000 | -1.646129000 |
| C | -1.683164000 | -2.464959000 | -1.889143000 |
| C | -2.135598000 | -3.785960000 | -1.767318000 |

|   |              |              |              |
|---|--------------|--------------|--------------|
| C | 1.865707000  | -2.730615000 | -1.764384000 |
| C | -1.926828000 | 2.555707000  | -1.391409000 |
| C | 4.496619000  | 4.692837000  | -1.281154000 |
| C | 5.004625000  | 3.308488000  | -0.813750000 |
| C | 3.972745000  | -1.697064000 | -1.086911000 |
| C | 2.543967000  | -1.625875000 | -1.122832000 |
| C | -3.024552000 | 3.169300000  | -0.795506000 |
| C | -1.505165000 | 1.303892000  | -0.832036000 |
| C | 3.412707000  | 1.286022000  | -0.740240000 |
| C | -5.982940000 | 3.706083000  | -0.142927000 |
| C | 6.099435000  | 3.501083000  | 0.262069000  |
| C | 3.832616000  | 2.504491000  | -0.218549000 |
| C | 2.313028000  | 0.606855000  | -0.176296000 |
| C | -3.744962000 | 2.635750000  | 0.307627000  |
| C | -2.295033000 | 0.686978000  | 0.197247000  |
| C | -4.893241000 | 3.456055000  | 0.926407000  |
| C | -3.371718000 | 1.383982000  | 0.783704000  |
| C | 3.135246000  | 3.020892000  | 0.907235000  |
| C | -4.040149000 | -1.587077000 | 1.019764000  |
| C | 1.548301000  | 1.212535000  | 0.878138000  |
| C | -2.609958000 | -1.569232000 | 1.060099000  |
| C | -5.548124000 | 2.733873000  | 2.117424000  |
| C | -4.772482000 | -2.633899000 | 1.541371000  |
| C | 2.017491000  | 2.425272000  | 1.483971000  |
| C | 1.987583000  | -3.925273000 | 1.602438000  |
| C | -4.348591000 | 4.813845000  | 1.429191000  |
| C | -1.973977000 | -2.720065000 | 1.662391000  |
| C | 1.582735000  | -2.596432000 | 1.787832000  |
| C | 3.241924000  | -4.338692000 | 2.052888000  |
| C | -4.142313000 | -3.733545000 | 2.170008000  |
| C | -0.142857000 | 3.471766000  | 2.279865000  |
| C | -2.766838000 | -3.758690000 | 2.226481000  |
| C | 2.423651000  | -1.688936000 | 2.439267000  |
| C | 1.285757000  | 3.045554000  | 2.691790000  |
| C | 4.090106000  | -3.434696000 | 2.700724000  |
| C | 3.674226000  | -2.114361000 | 2.895557000  |
| C | 2.014956000  | 4.292774000  | 3.228025000  |
| C | 1.209131000  | 2.017222000  | 3.845641000  |
| H | -0.592235000 | 2.674293000  | -4.614982000 |
| H | -2.139912000 | 1.959490000  | -4.103211000 |
| H | -1.281764000 | 4.896504000  | -3.913545000 |
| H | -0.598044000 | 1.284236000  | -3.502693000 |
| H | -2.878712000 | 4.314304000  | -3.397423000 |
| H | -4.379154000 | -1.100235000 | -3.454353000 |
| H | 4.920748000  | 2.458340000  | -2.842991000 |
| H | -5.211104000 | -3.440964000 | -3.206049000 |
| H | 4.557445000  | -4.623168000 | -2.764615000 |
| H | 2.051841000  | -4.562977000 | -2.867568000 |
| H | 0.829021000  | 3.989659000  | -2.981349000 |
| H | 6.473418000  | 3.205926000  | -2.414835000 |
| H | 6.050717000  | 1.613635000  | -1.753124000 |
| H | -2.116652000 | -0.484143000 | -2.618478000 |

|   |              |              |              |
|---|--------------|--------------|--------------|
| H | -1.864991000 | 5.269484000  | -2.281468000 |
| H | -3.756304000 | -5.161006000 | -2.127452000 |
| H | 5.322985000  | 5.281924000  | -1.712792000 |
| H | 5.755398000  | -2.773396000 | -1.557438000 |
| H | 0.822614000  | 2.665960000  | -1.786092000 |
| H | 3.714776000  | 4.586127000  | -2.049694000 |
| H | -1.490221000 | -4.531516000 | -1.300305000 |
| H | 3.901678000  | 0.855142000  | -1.610074000 |
| H | 0.264288000  | 4.291093000  | -1.318621000 |
| H | -6.402131000 | 2.754897000  | -0.508266000 |
| H | -3.340678000 | 4.137041000  | -1.180813000 |
| H | -5.589553000 | 4.254207000  | -1.012426000 |
| H | 6.489134000  | 2.529752000  | 0.606317000  |
| H | 6.943458000  | 4.081438000  | -0.146292000 |
| H | 4.519616000  | -0.926506000 | -0.547884000 |
| H | 4.070680000  | 5.276619000  | -0.451032000 |
| H | -6.808848000 | 4.302132000  | 0.279719000  |
| H | -4.556972000 | -0.778622000 | 0.507209000  |
| H | 5.721766000  | 4.041475000  | 1.143302000  |
| H | -5.986980000 | 1.767681000  | 1.822813000  |
| H | 1.316787000  | -4.623642000 | 1.099658000  |
| H | 3.487081000  | 3.961308000  | 1.327549000  |
| H | -3.908409000 | 5.408514000  | 0.614378000  |
| H | -3.879907000 | 0.938324000  | 1.634901000  |
| H | -5.862017000 | -2.613450000 | 1.450640000  |
| H | -0.108821000 | 4.239987000  | 1.491015000  |
| H | -6.361163000 | 3.352986000  | 2.528266000  |
| H | 3.557469000  | -5.373206000 | 1.896036000  |
| H | -5.159327000 | 5.412572000  | 1.876862000  |
| H | -0.727044000 | 2.622009000  | 1.904776000  |
| H | -4.829611000 | 2.549140000  | 2.931128000  |
| H | 2.059639000  | 5.102797000  | 2.483193000  |
| H | -3.569562000 | 4.666954000  | 2.193896000  |
| H | -4.734984000 | -4.545623000 | 2.595486000  |
| H | -2.229128000 | -4.581070000 | 2.701985000  |
| H | 2.085467000  | -0.669223000 | 2.609901000  |
| H | 5.070855000  | -3.760264000 | 3.056350000  |
| H | -0.673940000 | 3.900712000  | 3.146360000  |
| H | 3.043315000  | 4.065745000  | 3.551734000  |
| H | 4.323425000  | -1.405486000 | 3.415650000  |
| H | 0.649029000  | 1.120899000  | 3.548513000  |
| H | 1.472106000  | 4.684592000  | 4.102507000  |
| H | 2.218358000  | 1.711221000  | 4.167097000  |
| H | 0.701349000  | 2.463228000  | 4.716735000  |
| N | 0.520691000  | -2.856513000 | -1.962309000 |
| N | -0.356145000 | -2.122631000 | -1.420608000 |
| N | 1.825808000  | -0.634693000 | -0.557614000 |
| N | -1.854540000 | -0.584876000 | 0.532019000  |
| N | 0.269007000  | -2.186080000 | 1.335678000  |
| N | -0.634497000 | -2.903786000 | 1.854116000  |
| O | -0.437574000 | 0.661707000  | -1.236977000 |
| O | 0.457244000  | 0.595833000  | 1.259700000  |



|    |              |              |              |
|----|--------------|--------------|--------------|
| Co | -0.017347000 | -0.770747000 | -0.016122000 |
|----|--------------|--------------|--------------|

**Table S4.** DFT-optimized coordinates for [1]<sup>1+</sup>.

|   |              |              |              |
|---|--------------|--------------|--------------|
| C | -0.345095000 | 0.129397000  | 0.171504000  |
| C | -0.213429000 | 0.103497000  | 2.661692000  |
| C | 0.629594000  | 0.094459000  | 1.363421000  |
| C | 3.775277000  | -5.220068000 | 0.996926000  |
| C | 1.442392000  | -1.219107000 | 1.274837000  |
| C | 1.024661000  | 4.890962000  | -1.115139000 |
| C | 1.590717000  | 2.239573000  | 0.332354000  |
| C | 1.584448000  | 1.304358000  | 1.351241000  |
| C | 4.605684000  | -5.047990000 | 2.291820000  |
| C | 3.835171000  | -5.704989000 | 3.450360000  |
| C | 5.964113000  | -5.773703000 | 2.135950000  |
| C | 0.625387000  | 4.241691000  | 5.396357000  |
| C | 2.433795000  | 4.261770000  | -0.991717000 |
| C | 2.729465000  | 3.405511000  | -2.246829000 |
| C | 2.477324000  | 3.366908000  | 0.257041000  |
| C | 1.340619000  | 3.051085000  | 5.241190000  |
| C | 2.546043000  | 1.508438000  | 2.404906000  |
| C | 0.988221000  | 5.163529000  | 6.383761000  |
| C | 4.859174000  | -3.552025000 | 2.538164000  |
| C | 4.447096000  | -2.900695000 | 3.686734000  |
| C | 5.547681000  | -2.792047000 | 1.532906000  |
| C | 3.469224000  | 5.398286000  | -0.927922000 |
| C | 3.338607000  | 3.596659000  | 1.314650000  |
| C | 2.418104000  | 2.787894000  | 6.091278000  |
| C | 3.356183000  | 2.715440000  | 2.424005000  |
| C | 5.489282000  | 0.343823000  | -0.196958000 |
| C | 2.065027000  | 4.887460000  | 7.231776000  |
| C | 4.682275000  | -1.512161000 | 3.842431000  |
| C | 5.765013000  | -1.427302000 | 1.583453000  |
| C | 6.983506000  | -1.603953000 | -0.648818000 |
| C | 5.259932000  | -0.747386000 | 2.749428000  |
| C | 2.778828000  | 3.695215000  | 7.093671000  |
| C | 3.567311000  | -0.413110000 | 7.193032000  |
| C | 4.250702000  | -1.213429000 | 6.213937000  |
| C | 3.381378000  | -0.902076000 | 8.509642000  |
| C | 6.474813000  | -0.655882000 | 0.453546000  |
| C | 4.800796000  | -2.440781000 | 6.667052000  |
| C | 3.904972000  | -2.118800000 | 8.907650000  |
| C | 4.637157000  | -2.875401000 | 7.974696000  |
| C | 4.084795000  | 5.292410000  | 3.721229000  |
| C | 4.605152000  | 4.014115000  | 4.052605000  |
| C | 4.624481000  | 6.458135000  | 4.245885000  |
| C | 7.696898000  | 0.105783000  | 1.021513000  |
| C | 5.680300000  | 3.983080000  | 5.006101000  |

|   |              |              |              |
|---|--------------|--------------|--------------|
| C | 5.722787000  | 6.421798000  | 5.124195000  |
| C | 6.811474000  | 0.742854000  | 6.006091000  |
| C | 7.560036000  | -0.163556000 | 5.250150000  |
| C | 6.235759000  | 5.191704000  | 5.493803000  |
| C | 6.942516000  | 0.795339000  | 7.398345000  |
| C | 8.442162000  | -1.029200000 | 5.902578000  |
| C | 7.817890000  | -0.082483000 | 8.040879000  |
| C | 8.568864000  | -0.996155000 | 7.295089000  |
| H | -1.021390000 | -0.736884000 | 0.228281000  |
| H | -0.972123000 | 1.034897000  | 0.173210000  |
| H | -0.916335000 | -0.744584000 | 2.656935000  |
| H | 0.176588000  | 0.070700000  | -0.796471000 |
| H | -0.809753000 | 1.027202000  | 2.738370000  |
| H | 3.584630000  | -6.288770000 | 0.809776000  |
| H | 0.757068000  | -2.082107000 | 1.273610000  |
| H | 2.802011000  | -4.711085000 | 1.079487000  |
| H | 0.234244000  | 4.131261000  | -1.211785000 |
| H | 4.292628000  | -4.818727000 | 0.112457000  |
| H | 0.414091000  | 0.014227000  | 3.558395000  |
| H | 0.894749000  | 2.102137000  | -0.492718000 |
| H | 0.789598000  | 5.513444000  | -0.237252000 |
| H | 2.029283000  | -1.255409000 | 0.343260000  |
| H | 0.974882000  | 5.532849000  | -2.009015000 |
| H | 5.799382000  | -6.847082000 | 1.951203000  |
| H | 2.130540000  | -1.332595000 | 2.122415000  |
| H | -0.231222000 | 4.441737000  | 4.748340000  |
| H | 3.673254000  | -6.771105000 | 3.230933000  |
| H | 2.844987000  | -5.246872000 | 3.599469000  |
| H | 1.994228000  | 2.598564000  | -2.385333000 |
| H | 1.044166000  | 2.316894000  | 4.493866000  |
| H | 0.424367000  | 6.091987000  | 6.499621000  |
| H | 2.699472000  | 4.036048000  | -3.149563000 |
| H | 6.553568000  | -5.381750000 | 1.293349000  |
| H | 6.573269000  | -5.676254000 | 3.048541000  |
| H | 4.389844000  | -5.648441000 | 4.400222000  |
| H | 3.905227000  | -3.433603000 | 4.462877000  |
| H | 4.627450000  | -0.184200000 | -0.634893000 |
| H | 5.895121000  | -3.333388000 | 0.655398000  |
| H | 6.163304000  | -2.145702000 | -1.145144000 |
| H | 3.293423000  | 6.070806000  | -0.073659000 |
| H | 3.728493000  | 2.945774000  | -2.186618000 |
| H | 3.406737000  | 6.009135000  | -1.841125000 |
| H | 5.995077000  | 0.892682000  | -1.007821000 |
| H | 5.113334000  | 1.077840000  | 0.527279000  |
| H | 4.499048000  | 5.014211000  | -0.860215000 |
| H | 2.347440000  | 5.598531000  | 8.011525000  |
| H | 4.038160000  | 4.427511000  | 1.291267000  |
| H | 2.817846000  | -0.270479000 | 9.198326000  |
| H | 7.703696000  | -2.342766000 | -0.263209000 |
| H | 3.208289000  | 5.354832000  | 3.079670000  |
| H | 7.499262000  | -1.016596000 | -1.423281000 |
| H | 5.408466000  | -3.030264000 | 5.983811000  |

|    |             |              |             |
|----|-------------|--------------|-------------|
| H  | 3.764359000 | -2.478079000 | 9.928510000 |
| H  | 5.096476000 | -3.818806000 | 8.280191000 |
| H  | 3.612197000 | 3.464008000  | 7.759597000 |
| H  | 4.176234000 | 7.417374000  | 3.975211000 |
| H  | 7.401580000 | 0.854510000  | 1.768528000 |
| H  | 8.222015000 | 0.630607000  | 0.207674000 |
| H  | 8.415611000 | -0.589897000 | 1.484436000 |
| H  | 7.481043000 | -0.165001000 | 4.164124000 |
| H  | 6.362233000 | 1.521875000  | 7.970088000 |
| H  | 6.152951000 | 7.344872000  | 5.516507000 |
| H  | 9.045442000 | -1.724549000 | 5.314124000 |
| H  | 7.078667000 | 5.108277000  | 6.181785000 |
| H  | 7.919095000 | -0.044804000 | 9.127953000 |
| H  | 9.261352000 | -1.675097000 | 7.797976000 |
| N  | 2.997503000 | 0.825452000  | 7.002079000 |
| N  | 3.150503000 | 1.535380000  | 5.979810000 |
| N  | 4.400471000 | -0.745975000 | 4.938078000 |
| N  | 4.093366000 | 2.843516000  | 3.567119000 |
| N  | 5.921112000 | 1.687784000  | 5.348791000 |
| N  | 6.313203000 | 2.868439000  | 5.507551000 |
| O  | 2.708520000 | 0.677153000  | 3.385278000 |
| O  | 5.324488000 | 0.537577000  | 2.902202000 |
| Co | 4.280202000 | 1.115898000  | 4.421215000 |

**Table S5.** DFT-optimized coordinates for [1]<sup>1-</sup>.

|    |              |              |              |
|----|--------------|--------------|--------------|
| Co | 16.703954000 | 7.828361000  | 10.382383000 |
| O  | 15.321237000 | 8.089870000  | 9.067748000  |
| O  | 15.387158000 | 8.208981000  | 11.733869000 |
| N  | 18.156827000 | 7.752652000  | 11.747968000 |
| N  | 16.120181000 | 5.992852000  | 10.607910000 |
| N  | 17.005392000 | 9.730887000  | 10.157041000 |
| N  | 18.003375000 | 7.248078000  | 8.983920000  |
| C  | 14.982857000 | 9.364359000  | 8.992279000  |
| C  | 14.507023000 | 7.227271000  | 11.819545000 |
| N  | 19.136026000 | 8.567194000  | 11.823247000 |
| C  | 18.316166000 | 6.678714000  | 12.695292000 |
| C  | 16.883768000 | 4.916592000  | 10.414833000 |
| C  | 14.832509000 | 5.993983000  | 11.176462000 |
| C  | 15.844838000 | 10.313663000 | 9.614175000  |
| C  | 18.177040000 | 10.344732000 | 10.325115000 |
| N  | 18.510835000 | 6.081853000  | 8.891556000  |
| C  | 18.605668000 | 8.141235000  | 8.026508000  |
| C  | 13.819103000 | 9.825436000  | 8.306326000  |
| C  | 13.279445000 | 7.335468000  | 12.532763000 |
| C  | 19.226890000 | 9.722465000  | 11.120121000 |
| C  | 17.270325000 | 6.340923000  | 13.563140000 |
| C  | 19.538605000 | 5.993833000  | 12.783273000 |
| C  | 18.086538000 | 5.004758000  | 9.598301000  |

|   |              |              |              |
|---|--------------|--------------|--------------|
| C | 16.633835000 | 3.629307000  | 11.014239000 |
| C | 13.884441000 | 4.967966000  | 11.092711000 |
| C | 15.469638000 | 11.663022000 | 9.710536000  |
| C | 18.523250000 | 11.605993000 | 9.717689000  |
| C | 17.802098000 | 8.906963000  | 7.172876000  |
| C | 20.003058000 | 8.214658000  | 7.915243000  |
| C | 12.916441000 | 8.837415000  | 7.537357000  |
| C | 13.524679000 | 11.192937000 | 8.384667000  |
| C | 12.942340000 | 8.615913000  | 13.326679000 |
| C | 12.388312000 | 6.250662000  | 12.462607000 |
| C | 20.470325000 | 10.399633000 | 11.311693000 |
| H | 16.334329000 | 6.891493000  | 13.506957000 |
| C | 17.449626000 | 5.324940000  | 14.505715000 |
| C | 19.707157000 | 4.976347000  | 13.722657000 |
| H | 20.347007000 | 6.266238000  | 12.103522000 |
| C | 18.887987000 | 3.842115000  | 9.383101000  |
| H | 15.796711000 | 3.537485000  | 11.702734000 |
| C | 17.461267000 | 2.550307000  | 10.812332000 |
| H | 14.117189000 | 4.085954000  | 10.495778000 |
| C | 12.640745000 | 5.075966000  | 11.733408000 |
| C | 14.300502000 | 12.128261000 | 9.098934000  |
| H | 16.094110000 | 12.335100000 | 10.294671000 |
| H | 17.804921000 | 12.064065000 | 9.041367000  |
| C | 19.751659000 | 12.196175000 | 9.895770000  |
| H | 16.720194000 | 8.827990000  | 7.249271000  |
| C | 18.395959000 | 9.737933000  | 6.219096000  |
| H | 20.619000000 | 7.613923000  | 8.585717000  |
| C | 20.587978000 | 9.053103000  | 6.966023000  |
| C | 12.298902000 | 7.814134000  | 8.518699000  |
| C | 11.760377000 | 9.550314000  | 6.809770000  |
| C | 13.747382000 | 8.088046000  | 6.468480000  |
| H | 12.626467000 | 11.553283000 | 7.883577000  |
| C | 12.836858000 | 9.822279000  | 12.364586000 |
| C | 11.605037000 | 8.497285000  | 14.083279000 |
| C | 14.047384000 | 8.889884000  | 14.374451000 |
| H | 11.440241000 | 6.339304000  | 12.986811000 |
| C | 20.747444000 | 11.608252000 | 10.722127000 |
| H | 21.197055000 | 9.896745000  | 11.953464000 |
| C | 18.663395000 | 4.636699000  | 14.590209000 |
| H | 16.628193000 | 5.075619000  | 15.182931000 |
| H | 20.659623000 | 4.441090000  | 13.772866000 |
| H | 19.752068000 | 3.969384000  | 8.727317000  |
| C | 18.601163000 | 2.633329000  | 9.968021000  |
| H | 17.240728000 | 1.612495000  | 11.331926000 |
| C | 11.614227000 | 3.930667000  | 11.603985000 |
| C | 13.841088000 | 13.598790000 | 9.184617000  |
| H | 19.968382000 | 13.131957000 | 9.370927000  |
| C | 19.787311000 | 9.818483000  | 6.111286000  |
| H | 17.758043000 | 10.324484000 | 5.552337000  |
| H | 21.677901000 | 9.112867000  | 6.897885000  |
| H | 11.663932000 | 8.321784000  | 9.262333000  |
| H | 13.076815000 | 7.259786000  | 9.059032000  |

|   |              |              |              |
|---|--------------|--------------|--------------|
| H | 11.668864000 | 7.090512000  | 7.971876000  |
| H | 12.123160000 | 10.291816000 | 6.079320000  |
| H | 11.082989000 | 10.064420000 | 7.510178000  |
| H | 11.160277000 | 8.807429000  | 6.259139000  |
| H | 14.570583000 | 7.528295000  | 6.931785000  |
| H | 14.171837000 | 8.794535000  | 5.735292000  |
| H | 13.110132000 | 7.373764000  | 5.918691000  |
| H | 12.020210000 | 9.672848000  | 11.640141000 |
| H | 13.768085000 | 9.965547000  | 11.801764000 |
| H | 12.623412000 | 10.746396000 | 12.930627000 |
| H | 11.607448000 | 7.661525000  | 14.801919000 |
| H | 10.751889000 | 8.357858000  | 13.400366000 |
| H | 11.421850000 | 9.423933000  | 14.651918000 |
| H | 15.023343000 | 9.023960000  | 13.889508000 |
| H | 14.122858000 | 8.054730000  | 15.091068000 |
| H | 13.816410000 | 9.805633000  | 14.946185000 |
| H | 21.710289000 | 12.101790000 | 10.872731000 |
| H | 18.795677000 | 3.838461000  | 15.325853000 |
| H | 19.235601000 | 1.760216000  | 9.799413000  |
| C | 10.324051000 | 4.207360000  | 12.397449000 |
| C | 12.224016000 | 2.612666000  | 12.136448000 |
| C | 11.228717000 | 3.743959000  | 10.117615000 |
| C | 12.446215000 | 13.676270000 | 9.848298000  |
| C | 13.761048000 | 14.206364000 | 7.764450000  |
| C | 14.807217000 | 14.463131000 | 10.015304000 |
| H | 20.246405000 | 10.475803000 | 5.367665000  |
| H | 10.523624000 | 4.326972000  | 13.474041000 |
| H | 9.621887000  | 3.365170000  | 12.279896000 |
| H | 9.814702000  | 5.117172000  | 12.043875000 |
| H | 11.505600000 | 1.779199000  | 12.042334000 |
| H | 12.498251000 | 2.709557000  | 13.199471000 |
| H | 13.133136000 | 2.331806000  | 11.583139000 |
| H | 10.502249000 | 2.920621000  | 9.998276000  |
| H | 12.107120000 | 3.509119000  | 9.497489000  |
| H | 10.776919000 | 4.663592000  | 9.713254000  |
| H | 12.099428000 | 14.722775000 | 9.915433000  |
| H | 12.475284000 | 13.257180000 | 10.866566000 |
| H | 11.693359000 | 13.109736000 | 9.279442000  |
| H | 14.746285000 | 14.179297000 | 7.271626000  |
| H | 13.425524000 | 15.257861000 | 7.803876000  |
| H | 13.055549000 | 13.654119000 | 7.124910000  |
| H | 15.820300000 | 14.477145000 | 9.583691000  |
| H | 14.887022000 | 14.103271000 | 11.052798000 |
| H | 14.446014000 | 15.504468000 | 10.050583000 |

**Table S6.** X-Ray structural and DFT-optimized (B3LYP) (in parentheses) selected bond lengths of **[1]**, **[1]<sup>1+</sup>** and **[1]<sup>1-</sup>**.

|         | <b>1</b>         | <b>[1]<sup>1+</sup></b> | <b>[1]<sup>1-</sup></b> |
|---------|------------------|-------------------------|-------------------------|
| Co–O1   | 1.911(3) [1.929] | 1.926(5) [1.933]        | 1.922(4) [1.925]        |
| Co–N1   | 1.887(4) [1.926] | 1.886(5) [1.936]        | 1.894(5) [1.939]        |
| Co–N3   | 1.920(4) [1.978] | 1.927(5) [1.967]        | 1.930(5) [1.995]        |
| O1–C1   | 1.327(6) [1.310] | 1.286(7) [1.296]        | 1.343(6) [1.321]        |
| C1–C2   | 1.423(7) [1.435] | 1.427(9) [1.441]        | 1.405(8) [1.424]        |
| C2–C7   | 1.381(7) [1.391] | 1.385(9) [1.383]        | 1.395(8) [1.406]        |
| C7–C8   | 1.401(7) [1.421] | 1.403(9) [1.436]        | 1.390(8) [1.405]        |
| C8–C13  | 1.389(7) [1.390] | 1.381(9) [1.383]        | 1.373(8) [1.403]        |
| C13–C14 | 1.397(7) [1.410] | 1.404(9) [1.417]        | 1.389(8) [1.399]        |
| C1–C14  | 1.416(7) [1.436] | 1.422(9) [1.454]        | 1.402(8) [1.428]        |
| N1–C14  | 1.403(6) [1.387] | 1.402(8) [1.366]        | 1.416(7) [1.408]        |
| N1–C15  | 1.345(7) [1.348] | 1.349(8) [1.367]        | 1.336(7) [1.333]        |
|         |                  |                         |                         |
| Co–O2   | 1.908(3) [1.929] | 1.922(2) [1.932]        | 1.921(4) [1.926]        |
| Co–N4   | 1.891(4) [1.926] | 1.873(5) [1.936]        | 1.888(4) [1.939]        |
| Co–N6   | 1.918(4) [1.978] | 1.946(5) [1.970]        | 1.930(5) [1.995]        |
| O2–C27  | 1.316(6) [1.310] | 1.301(4) [1.296]        | 1.337(6) [1.321]        |
| C27–C28 | 1.434(7) [1.434] | 1.429(10) [1.441]       | 1.408(7) [1.427]        |
| C28–C33 | 1.387(7) [1.392] | 1.355(10) [1.382]       | 1.390(8) [1.401]        |
| C33–C34 | 1.410(9) [1.421] | 1.438(4) [1.436]        | 1.399(8) [1.409]        |
| C34–C39 | 1.374(8) [1.390] | 1.367(4) [1.383]        | 1.386(8) [1.399]        |
| C39–C40 | 1.405(7) [1.410] | 1.407(4) [1.417]        | 1.391(7) [1.404]        |

|         |                  |                  |                  |
|---------|------------------|------------------|------------------|
| C27–C40 | 1.416(7) [1.437] | 1.421(4) [1.454] | 1.404(8) [1.425] |
| N4–C40  | 1.386(6) [1.387] | 1.373(8) [1.367] | 1.416(7) [1.408] |
| N4–C41  | 1.362(6) [1.348] | 1.380(8) [1.367] | 1.331(7) [1.333] |

**Table S7.** TD-DFT-calculated electronic transitions of **1**.

| Excitation energy (eV) | $\lambda$ (nm) | $f$    | Transition                                                                                                                                                         | Character                                                                                                                                       |
|------------------------|----------------|--------|--------------------------------------------------------------------------------------------------------------------------------------------------------------------|-------------------------------------------------------------------------------------------------------------------------------------------------|
| 1.1160                 | 1111           | 0.0388 | $\beta$ -H - 1 [ $\sim$ 94%L] $\rightarrow$<br>$\beta$ -L [ $\sim$ 96%L] (96%)                                                                                     | Inter-ligand charge-transfer (CT) from amido-phenolate moiety to phenyl-iminosemiquinonate moiety                                               |
| 1.2742                 | 973            | 0.008  | $\beta$ -H [ $\sim$ 99%L] $\rightarrow$<br>$\beta$ -L + 1 [ $\sim$ 96%L] (10%)<br>$\beta$ -H - 2 [ $\sim$ 99%L] $\rightarrow$<br>$\beta$ -L [ $\sim$ 96%L] (56%)   | CT from amido-phenolate and phenyl-iminosemiquinonate to azo<br>Inter-ligand CT from amido-phenolate moiety to phenyl-iminosemiquinonate moiety |
| 1.5550                 | 797            | 0.0106 | $\alpha$ -H [ $\sim$ 96%L] $\rightarrow$<br>$\alpha$ -L + 3 [ $\sim$ 38%M] (29%)<br>$\beta$ -H [ $\sim$ 99%L] $\rightarrow$<br>$\beta$ -L + 2 [ $\sim$ 99%L] (14%) | CT from amido-phenolate and phenyl-iminosemiquinonate to Co and azo<br>CT from amido-phenolate and phenyl-iminosemiquinonate to azo             |
| 1.7664                 | 702            | 0.0372 | $\alpha$ -H [ $\sim$ 96%L] $\rightarrow$<br>$\alpha$ -L [ $\sim$ 96%L] (39%)<br>$\beta$ -H [ $\sim$ 99%L] $\rightarrow$<br>$\beta$ -L + 2 [ $\sim$ 99%L] (22%)     | CT from amido-phenolate and phenyl-iminosemiquinonate to azo<br>CT from amido-phenolate and phenyl-iminosemiquinonate to azo                    |
| 1.7742                 | 699            | 0.0401 | $\alpha$ -H [ $\sim$ 96%L] $\rightarrow$<br>$\alpha$ -L + 1 [ $\sim$ 99%L] (61%)                                                                                   | CT from amido-phenolate and phenyl-iminosemiquinonate to azo                                                                                    |



|        |     |        |                                                                                                         |                                                                         |
|--------|-----|--------|---------------------------------------------------------------------------------------------------------|-------------------------------------------------------------------------|
|        |     |        | $\beta\text{-H}$ [ $\sim 99\%L$ ] $\rightarrow$<br>$\beta\text{-L} + 1$ [ $\sim 96\%L$ ]<br>(29%)       | CT from amido-phenolate and phenyl-<br>iminosemiquinonate to azo        |
| 1.9060 | 651 | 0.018  | $\alpha\text{-H} - 1$ [ $\sim 99\%L$ ] $\rightarrow$<br>$\alpha\text{-L}$ [ $\sim 96\%L$ ] (72%)        | CT from amido-phenolate and phenyl-<br>iminosemiquinonate to azo        |
|        |     |        | $\beta\text{-H}$ [ $\sim 99\%L$ ] $\rightarrow$<br>$\beta\text{-L} + 1$ [ $\sim 96\%L$ ]<br>(12%)       | CT from amido-phenolate and phenyl-<br>iminosemiquinonate to azo        |
| 1.9608 | 632 | 0.0383 | $\alpha\text{-H} - 1$ [ $\sim 99\%L$ ] $\rightarrow$<br>$\alpha\text{-L} + 1$ [ $\sim 99\%L$ ]<br>(37%) | CT from amido-phenolate and phenyl-<br>iminosemiquinonate to azo        |
|        |     |        | $\beta\text{-H}$ [ $\sim 99\%L$ ] $\rightarrow$<br>$\beta\text{-L} + 2$ [ $\sim 99\%L$ ]<br>(16%)       | CT from amido-phenolate and phenyl-<br>iminosemiquinonate to azo        |
| 2.0744 | 598 | 0.036  | $\beta\text{-H} - 3$ [ $\sim 99\%L$ ] $\rightarrow$<br>$\beta\text{-L}$ [ $\sim 96\%L$ ] (68%)          | CT from amino-azo-phenyl moiety to<br>phenyl-iminosemiquinonate         |
| 2.2678 | 547 | 0.0374 | $\alpha\text{-H} - 1$ [ $\sim 99\%L$ ] $\rightarrow$<br>$\alpha\text{-L} + 2$ [ $\sim 42\%M$ ]<br>(78%) | CT from amido-phenolate and phenyl-<br>iminosemiquinonate to Co and azo |
| 2.4577 | 505 | 0.0287 | $\beta\text{-H} - 6$ [ $\sim 95\%L$ ] $\rightarrow$<br>$\beta\text{-L}$ [ $\sim 96\%L$ ] (30%)          | CT from amino-azo-phenyl moiety to<br>phenyl-iminosemiquinonate         |
|        |     |        | $\beta\text{-H} - 7$ [ $\sim 93\%L$ ] $\rightarrow$<br>$\beta\text{-L}$ [ $\sim 96\%L$ ] (37%)          | CT from phenyl appended to azo to<br>phenyl-iminosemiquinonate          |
| 2.7999 | 443 | 0.0322 | $\alpha\text{-H} - 2$ [ $\sim 94\%L$ ] $\rightarrow$<br>$\alpha\text{-L} + 1$ [ $\sim 99\%L$ ]<br>(34%) | CT from amido-phenolate and phenyl-<br>iminosemiquinonate to azo        |

---

|        |     |        |                                              |                                     |
|--------|-----|--------|----------------------------------------------|-------------------------------------|
|        |     |        | $\beta$ -H - 10 [ $\sim$ 93%L] $\rightarrow$ | CT from phenyl azo to phenyl-       |
|        |     |        | $\beta$ -L [ $\sim$ 96%L] (21%)              | iminosemiquinonate                  |
| 2.8887 | 429 | 0.0326 | $\alpha$ -H - 3 [ $\sim$ 99%L] $\rightarrow$ | CT from amido-phenolate and phenyl- |
|        |     |        | $\alpha$ -L [ $\sim$ 96%L] (49%)             | iminosemiquinonate to azo           |

---

**Table S8.** TD-DFT-calculated electronic transitions of [1]<sup>1+</sup>.

| Excitation energy (eV) | $\lambda$ (nm) | $f$    | Transition                                                                          | Character                                                                                       |
|------------------------|----------------|--------|-------------------------------------------------------------------------------------|-------------------------------------------------------------------------------------------------|
| 0.9366                 | 1324           | 0.0237 | $\alpha$ -H [ $\sim$ 98%L] $\rightarrow$<br>$\alpha$ -L [ $\sim$ 98%L] (51%)        | Inter-ligand CT involving phenyl-<br>iminosemiquinonate part of one ligand<br>to other ligand   |
|                        |                |        | $\beta$ -H [ $\sim$ 98%L] $\rightarrow$<br>$\beta$ -L [ $\sim$ 98%L] (47%)          | Inter-ligand CT involving phenyl-<br>iminosemiquinonate part one ligand to<br>other ligand      |
| 1.1962                 | 1037           | 0.0213 | $\alpha$ -H - 1 [ $\sim$ 96%L] $\rightarrow$<br>$\alpha$ -L [ $\sim$ 98%L] (48%)    | Intra-ligand CT involving phenyl-<br>iminosemiquinonate                                         |
|                        |                |        | $\beta$ -H - 1 [ $\sim$ 96%L] $\rightarrow$<br>$\beta$ -L [ $\sim$ 98%L] (48%)      | Intra-ligand CT involving phenyl-<br>iminosemiquinonate                                         |
| 1.2324                 | 1006           | 0.0711 | $\alpha$ -H - 1 [ $\sim$ 96%L] $\rightarrow$<br>$\alpha$ -L [ $\sim$ 98%L] (46%)    | Intra-ligand CT involving phenyl-<br>iminosemiquinonate                                         |
|                        |                |        | $\beta$ -H - 1 [ $\sim$ 96%L] $\rightarrow$<br>$\beta$ -L [ $\sim$ 98%L] (46%)      | Intra-ligand CT involving phenyl-<br>iminosemiquinonate                                         |
| 1.7109                 | 725            | 0.0486 | $\alpha$ -H [ $\sim$ 98%L] $\rightarrow$<br>$\alpha$ -L + 1 [ $\sim$ 96%L]<br>(42%) | Intra-ligand CT from phenyl-<br>iminosemiquinonate to <i>o</i> -amino-azo<br>part of the ligand |
|                        |                |        | $\beta$ -H [ $\sim$ 98%L] $\rightarrow$<br>$\beta$ -L + 1 [ $\sim$ 96%L]<br>(39%)   | Intra-ligand CT from phenyl-<br>iminosemiquinonate to <i>o</i> -amino-azo<br>part of the ligand |

|        |     |        |                                                                                     |                                                                                                       |
|--------|-----|--------|-------------------------------------------------------------------------------------|-------------------------------------------------------------------------------------------------------|
| 1.7548 | 707 | 0.0204 | $\alpha$ -H [ $\sim$ 98%L] $\rightarrow$<br>$\alpha$ -L + 1 [ $\sim$ 96%L]<br>(29%) | Intra-ligand CT from phenyl-<br>iminosemiquinonate to <i>o</i> -amino-azo<br>part of the ligand       |
|        |     |        | $\beta$ -H [ $\sim$ 98%L] $\rightarrow$<br>$\beta$ -L + 1 [ $\sim$ 96%L]<br>(33%)   | Intra-ligand CT from phenyl-<br>iminosemiquinonate to <i>o</i> -amino-azo<br>part of the ligand       |
| 2.1466 | 578 | 0.0216 | $\alpha$ -H - 3 [ $\sim$ 99%L] $\rightarrow$<br>$\alpha$ -L [ $\sim$ 98%L] (15%)    | CT from azo appended phenyl ring to<br>phenyl-iminosemiquinonate                                      |
|        |     |        | $\beta$ -H - 3 [ $\sim$ 99%L] $\rightarrow$<br>$\beta$ -L [ $\sim$ 98%L] (19%)      | CT from azo appended phenyl ring to<br>phenyl-iminosemiquinonate                                      |
|        |     |        | $\alpha$ -H [ $\sim$ 98%L] $\rightarrow$<br>$\alpha$ -L + 4 [ $\sim$ 40%M]<br>(12%) | LMCT involving phenyl-<br>iminosemiquinonate to Co and CT<br>from phenyl-iminosemiquinonate to<br>azo |
|        |     |        | $\beta$ -H [ $\sim$ 98%L] $\rightarrow$<br>$\beta$ -L + 4 [ $\sim$ 60%L]<br>(12%)   | LMCT from phenyl-iminosemi-<br>quinonate to Co and CT from phenyl-<br>iminosemiquinonate to azo       |
| 2.1993 | 564 | 0.0466 | $\alpha$ -H [ $\sim$ 98%L] $\rightarrow$<br>$\alpha$ -L + 2 [ $\sim$ 98%L]<br>(13%) | CT from iminosemiquinonate of one<br>ligand to azo in other ligand                                    |
|        |     |        | $\beta$ -H [ $\sim$ 98%L] $\rightarrow$<br>$\beta$ -L + 2 [ $\sim$ 98%L]<br>(13%)   | CT from iminosemiquinonate of one<br>ligand to azo- in other ligand                                   |
|        |     |        | $\alpha$ -H - 3 [ $\sim$ 99%L] $\rightarrow$                                        | CT from azo-appended phenyl ring to                                                                   |

|        |     |        |                                                                                     |                                                                                                                                           |
|--------|-----|--------|-------------------------------------------------------------------------------------|-------------------------------------------------------------------------------------------------------------------------------------------|
|        |     |        | $\alpha$ -L [ $\sim$ 98%L] (14%)                                                    | phenyl-iminosemiquinonate                                                                                                                 |
|        |     |        | $\beta$ -H - 3 [ $\sim$ 99%L] $\rightarrow$<br>$\beta$ -L [ $\sim$ 98%L] (13%)      | CT from azo appended phenyl ring to phenyl-iminosemiquinonate                                                                             |
| 2.2401 | 554 | 0.0482 | $\alpha$ -H [ $\sim$ 98%L] $\rightarrow$<br>$\alpha$ -L + 2 [ $\sim$ 98%L]<br>(31%) | CT from iminosemiquinonate of one ligand to azo in other ligand                                                                           |
|        |     |        | $\beta$ -H [ $\sim$ 98%L] $\rightarrow$<br>$\beta$ -L + 2 [ $\sim$ 98%L]<br>(32%)   | CT from iminosemiquinonate of one ligand to azo- in other ligand                                                                          |
| 2.4075 | 515 | 0.0597 | $\alpha$ -H - 5 [ $\sim$ 99%L] $\rightarrow$<br>$\alpha$ -L [ $\sim$ 98%L] (12%)    | Intraligand CT in iminosemiquinonate part of ligand and interligand charge-transfer from azo appended phenyl to iminosemiquinonate        |
|        |     |        | $\beta$ -H - 5 [ $\sim$ 99%L] $\rightarrow$<br>$\beta$ -L [ $\sim$ 98%L] (31%)      | Intraligand CT in iminosemiquinonate part of ligand and interligand CT from azo appended phenyl to iminosemiquinonate                     |
|        |     |        | $\alpha$ -H - 7 [ $\sim$ 99%L] $\rightarrow$<br>$\alpha$ -L [ $\sim$ 98%L] (7%)     | Intraligand CT in phenyl-iminosemiquinonate part of ligand and interligand charge-transfer from azo appended phenyl to iminosemiquinonate |
|        |     |        | $\beta$ -H - 7 [ $\sim$ 99%L] $\rightarrow$                                         | Intraligand CT in phenyl-                                                                                                                 |

|        |     |        |                                                                                        |                                                                                                     |
|--------|-----|--------|----------------------------------------------------------------------------------------|-----------------------------------------------------------------------------------------------------|
|        |     |        | $\beta$ -L [ $\sim$ 98%L] (19%)                                                        | iminosemiquinonate part of ligand and interligand CT from azo appended phenyl to iminosemiquinonate |
| 2.8645 | 433 | 0.0793 | $\alpha$ -H - 8 [ $\sim$ 92%L] $\rightarrow$<br>$\alpha$ -L [ $\sim$ 98%L] (11%)       | CT from azo-phenyl to phenyl-<br>iminosemiquinonate                                                 |
|        |     |        | $\beta$ -H - 8 [ $\sim$ 92%L] $\rightarrow$<br>$\beta$ -L [ $\sim$ 98%L] (10%)         | CT from azo-phenyl to phenyl-<br>iminosemiquinonate                                                 |
|        |     |        | $\alpha$ -H - 1 [ $\sim$ 96%L] $\rightarrow$<br>$\alpha$ -L + 2 [ $\sim$ 98%L]<br>(9%) | Intra-ligand CT from phenyl-<br>iminosemiquinonate to <i>o</i> -amino-azo<br>part of the ligand     |
|        |     |        | $\beta$ -H - 1 [ $\sim$ 96%L] $\rightarrow$<br>$\beta$ -L + 2 [ $\sim$ 98%L]<br>(7%)   | Intra-ligand CT from phenyl-<br>iminosemiquinonate to <i>o</i> -amino-azo<br>part of the ligand     |

**Table S9.** TD-DFT-calculated electronic transitions of [1]<sup>1-</sup>.

| Excitation energy (eV) | $\lambda$ (nm) | $F$    | Transition                                                                       | Character                                                         |
|------------------------|----------------|--------|----------------------------------------------------------------------------------|-------------------------------------------------------------------|
| 1.6513                 | 751            | 0.0391 | $\alpha$ -H [ $\sim$ 96%L] $\rightarrow$<br>$\alpha$ -L [ $\sim$ 99%L] (16%)     | Intra and inter-ligand CT involving amido-phenolate moiety to azo |
|                        |                |        | $\alpha$ -H [ $\sim$ 96%L] $\rightarrow$<br>$\alpha$ -L + 1 [ $\sim$ 97%L] (27%) | Intra and inter-ligand CT involving amido-phenolate moiety to azo |
|                        |                |        | $\beta$ -H [ $\sim$ 96%L] $\rightarrow$<br>$\beta$ -L [ $\sim$ 99%L] (16%)       | Intra and inter-ligand CT involving amido-phenolate moiety to azo |
|                        |                |        | $\beta$ -H [ $\sim$ 96%L] $\rightarrow$<br>$\beta$ -L + 1 [ $\sim$ 97%L] (27%)   | Intra and inter-ligand CT involving amido-phenolate moiety to azo |
| 1.7047                 | 727            | 0.0273 | $\alpha$ -H [ $\sim$ 96%L] $\rightarrow$<br>$\alpha$ -L [ $\sim$ 99%L] (29%)     | Intra and inter-ligand CT involving amido-phenolate moiety to azo |
|                        |                |        | $\alpha$ -H [ $\sim$ 96%L] $\rightarrow$<br>$\alpha$ -L + 1 [ $\sim$ 97%L] (15%) | Intra and inter-ligand CT involving amido-phenolate moiety to azo |
|                        |                |        | $\beta$ -H [ $\sim$ 96%L] $\rightarrow$<br>$\beta$ -L [ $\sim$ 99%L] (29%)       | Intra and inter-ligand CT involving amido-phenolate moiety to azo |

|        |     |        |                                                                                               |                                                                   |
|--------|-----|--------|-----------------------------------------------------------------------------------------------|-------------------------------------------------------------------|
|        |     |        | $\beta\text{-H} [\sim 96\%L] \rightarrow$<br>$\beta\text{-L} + 1 [\sim 97\%L]$<br>(15%)       | Intra and inter-ligand CT involving amido-phenolate moiety to azo |
| 1.9526 | 635 | 0.1014 | $\alpha\text{-H} - 1 [\sim 99\%L] \rightarrow$<br>$\alpha\text{-L} + 1 [\sim 97\%L]$<br>(37%) | Intra and inter-ligand CT involving amido-phenolate moiety to azo |
|        |     |        | $\beta\text{-H} - 1 [\sim 99\%L] \rightarrow$<br>$\beta\text{-L} + 1 [\sim 97\%L]$<br>(37%)   | Intra and inter-ligand CT involving amido-phenolate moiety to azo |
| 1.9661 | 631 | 0.1168 | $\alpha\text{-H} - 1 [\sim 99\%L] \rightarrow$<br>$\alpha\text{-L} [\sim 99\%L]$ (38%)        | Intra and inter-ligand CT involving amido-phenolate moiety to azo |
|        |     |        | $\beta\text{-H} - 1 [\sim 99\%L] \rightarrow$<br>$\beta\text{-L} [\sim 99\%L]$ (38%)          | Intra and inter-ligand CT involving amido-phenolate moiety to azo |
| 2.4124 | 514 | 0.0328 | $\alpha\text{-H} - 1 [\sim 99\%L] \rightarrow$<br>$\alpha\text{-L} + 2 [\sim 40\%M]$<br>(47%) | LMCT involving amido-phenolate to Co                              |
|        |     |        | $\beta\text{-H} - 1 [\sim 99\%L] \rightarrow$<br>$\beta\text{-L} + 2 [\sim 40\%M]$<br>(47%)   | LMCT involving amido-phenolate to Co                              |
| 2.5815 | 480 | 0.0362 | $\alpha\text{-H} - 2 [\sim 92\%L] \rightarrow$<br>$\alpha\text{-L} [\sim 99\%L]$ (41%)        | Intra ligand CT involving amido-phenolate moiety to azo           |
|        |     |        | $\beta\text{-H} - 2 [\sim 92\%L] \rightarrow$<br>$\beta\text{-L} [\sim 99\%L]$ (41%)          | Intra ligand CT involving amido-phenolate moiety to azo           |
| 2.6915 | 461 | 0.0241 | $\alpha\text{-H} - 1 [\sim 99\%L] \rightarrow$                                                | LMCT involving amido-phenolate to                                 |



---

|        |     |        |                                                                                                         |                                                         |
|--------|-----|--------|---------------------------------------------------------------------------------------------------------|---------------------------------------------------------|
|        |     |        | $\alpha\text{-L} + 3$ [ $\sim 37\%M$ ]<br>(17%)                                                         | Co                                                      |
|        |     |        | $\alpha\text{-H} - 3$ [ $\sim 99\%L$ ] $\rightarrow$<br>$\alpha\text{-L} + 1$ [ $\sim 97\%L$ ]<br>(19%) | Intra-ligand CT involving amido-phenolate moiety to azo |
|        |     |        | $\beta\text{-H} - 1$ [ $\sim 99\%L$ ] $\rightarrow$<br>$\beta\text{-L} + 3$ [ $\sim 37\%M$ ]<br>(17%)   | LMCT involving amido-phenolate to Co                    |
|        |     |        | $\beta\text{-H} - 3$ [ $\sim 99\%L$ ] $\rightarrow$<br>$\beta\text{-L} + 1$ [ $\sim 97\%L$ ]<br>(19%)   | Intra-ligand CT involving amido-phenolate moiety to azo |
| 2.7089 | 458 | 0.0459 | $\alpha\text{-H} - 1$ [ $\sim 99\%L$ ] $\rightarrow$<br>$\alpha\text{-L} + 3$ [ $\sim 37\%M$ ]<br>(30%) | LMCT involving amido-phenolate to Co                    |
|        |     |        | $\beta\text{-H} - 1$ [ $\sim 99\%L$ ] $\rightarrow$<br>$\beta\text{-L} + 3$ [ $\sim 37\%M$ ]<br>(30%)   | LMCT involving amido-phenolate to Co                    |

---
